# Supplementary material for: Diversifying the luminescence of phenanthro-diimine ligands in zinc complexes
Source: Royal Society of Chemistry journal article supplement (doi:10.1039/d1qi00149c), 2021-01-01
Supplement: d1qi00149c1.pdf [file d1qi00149c1.pdf]

*Supporting Information for*

Diversifying luminescence of phenanthro-diimine ligands in zinc  
complexes

*Diana Temerova,<sup>a</sup> Kristina S. Kisel,<sup>a,b</sup> Toni Eskelinen,<sup>a</sup> Alexei S. Melnikov,<sup>c</sup> Niko Kinnunen,<sup>a</sup> Pipsa Hirva,<sup>a</sup> Julia R. Shakirova,<sup>b</sup> Elena V. Grachova,<sup>b</sup> Igor O. Koshevoy<sup>a\*</sup>*

<sup>a</sup> Department of Chemistry, University of Eastern Finland, Joensuu, 80101, Finland

<sup>b</sup> St.Petersburg State University, Department of Chemistry, Universitetskii pr. 26, 198504, St.Petersburg, Russia.

<sup>c</sup> Centre for Nano- and Biotechnologies, Peter the Great St. Petersburg Polytechnic University, 195251 St. Petersburg, Russia.

E-mail: [igor.koshevoy@uef.fi](mailto:igor.koshevoy@uef.fi)

|                                                                                                                                                    |          |
|----------------------------------------------------------------------------------------------------------------------------------------------------|----------|
| <b>Experimental section</b>                                                                                                                        | S2–S10   |
| <b>Tables S1, S2.</b> Predicted low energy excitations and emission for complexes <b>1X–3X</b> and ligand <b>L3</b> in chloroform.                 | S11, S12 |
| <b>Tables S3, S4.</b> Crystal data and structure refinement.                                                                                       | S13–S16  |
| <b>Tables S5, S6.</b> Selected bond lengths and angles for complexes <b>1I, 1Cl, 1OAc, 2Cl, 2I, 3OAc<sub>y</sub></b> , and <b>1I<sub>b</sub></b> . | S17, S18 |
| <b>Tables S7, S8.</b> Emission parameters in the solid state for zinc complexes.                                                                   | S18, S19 |
| <b>Figures S1–S3.</b> <sup>1</sup> H NMR spectra of complexes <b>1X–3X</b> and ligand <b>L3</b> .                                                  | S20–S22  |
| <b>Figures S4.</b> Frontier molecular orbitals of complexes <b>1Cl, 1OAc</b> and <b>1I</b> .                                                       | S23      |
| <b>Figure S5.</b> Decay profile for long live band for complex <b>1I</b> .                                                                         | S24      |
| <b>Figure S6, S7.</b> Frontier molecular orbitals for complexes <b>2I, 2OAc, 3OAc</b> and <b>L3</b> .                                              | S24, S25 |
| <b>Figure S8.</b> Powder XRD patterns for <b>1OAc, 1Cl<sub>a/b</sub>, 1I<sub>a/b</sub>, 2Cl, 2I, L3</b> and <b>3OAc</b>                            | S26      |
| <b>Figures S9, S10.</b> Molecular views and packing fragments for <b>1Cl</b> and <b>1OAc</b> .                                                     | S27      |
| <b>Figure S11.</b> Solid state excitation spectra for <b>L1</b> and complexes <b>1X</b> at 298 K.                                                  | S28      |
| <b>Figure S12.</b> Variable temperature solid state emission spectra for <b>1I</b> .                                                               | S28      |
| <b>Figure S13.</b> Solid state excitation spectra for <b>L2</b> and complexes <b>2X</b> at 298 K.                                                  | S29      |
| <b>Figure S14.</b> Molecular view and unit cell packing for <b>2Cl</b> .                                                                           | S30      |
| <b>Figure S15.</b> Solid state excitation and emission spectra for <b>2OAc</b> at 298 K.                                                           | S30      |
| <b>Figure S16.</b> Molecular view and packing fragment for <b>L3<sub>cr</sub></b> .                                                                | S31      |
| <b>Figure S17.</b> Solid state excitation spectra for <b>L3</b> and complex <b>3OAc</b> at 298 K.                                                  | S31      |
| <b>References</b>                                                                                                                                  | S32      |

## Experimental section

**General comments.** 9,10-Dibromoanthracene,<sup>1</sup> 1-phenyl-2-(pyridin-2-yl)-1*H*-phenanthro[9,10-*d*]imidazole (**L1**)<sup>2</sup> and 1-(4-(anthracen-9-ylethynyl)phenyl)-2-(pyridin-2-yl)-1*H*-phenanthro[9,10-*d*]imidazole (**L2**)<sup>2</sup> were synthesized according to published procedures. Other reagents were used as received. Infrared spectra were measured on a Shimadzu IRAffinity-1 FTIR spectrophotometer in pressed KBr pellets. The solution <sup>1</sup>H and <sup>1</sup>H–<sup>1</sup>H COSY NMR spectra were recorded on a Bruker AMX-400 spectrometer. Microanalyses were carried out in the analytical laboratory of the University of Eastern Finland.

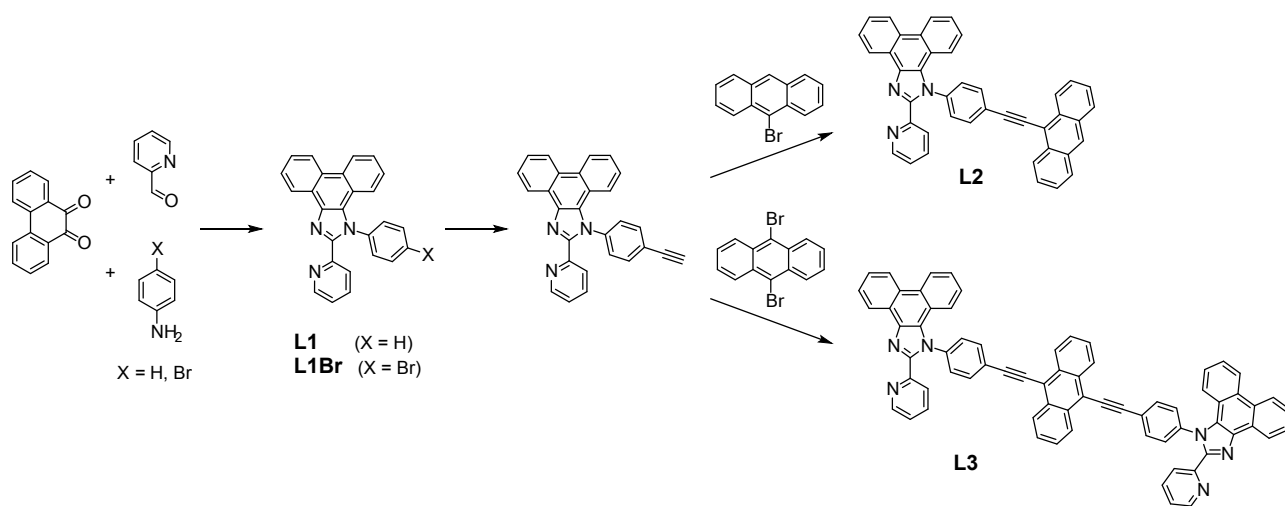

**Scheme S1.** Synthesis of ligands **L1**–**L3**.

**9,10-Bis((4-(2-(pyridin-2-yl)-1*H*-phenanthro[9,10-*d*]imidazole-1-yl)phenyl)ethynyl)anthracene (**L3**).** A mixture of 1-(4-ethynylphenyl)-2-(pyridin-2-yl)-*H*-phenanthro[9,10-*d*]imidazole<sup>2</sup> (200 mg, 0.5 mmol), 9,10-dibromoanthracene (85 mg, 0.25 mmol) and triphenylphosphine (68 mg, 0.2 mmol) in *n*-propylamine (15 mL) was degassed by three freeze-pump-thaw cycles. Bis(dibenzylideneacetone)palladium(0) (30 mg, 0.03 mmol) and copper(I) iodide (22 mg, 0.12 mmol) were added and the reaction mixture was stirred for 16 hours at 60°C under a nitrogen atmosphere. The resulting suspension was cooled to room temperature, the orange precipitate was collected, washed with *n*-propylamine (5 mL), methanol (5 mL), diethyl ether (5 mL) and dried (190 mg, 79%). Subsequent recrystallization at room temperature by a gas-phase diffusion of pentane into a dichlorobenzene solution afforded orange-red microcrystalline material (**L3<sub>r</sub>**). Slow evaporation of chloroform-dichlorobenzene solution at +5 °C afforded yellow flaky material (**L3<sub>y</sub>**). The yellow crystals of the minor form **L3<sub>y<sub>cr</sub></sub>** suitable for XRD analysis were obtained at room temperature by a gas-phase diffusion of pentane into a dichlorobenzene-dichloromethane (1:5 volume mixture) solution of **L3**. <sup>1</sup>H NMR (CDCl<sub>3</sub>, 298 K; δ): 8.92 (d, *J*<sub>HH</sub> 7.9 Hz, 2H), 8.84–8.81 (m, 6H), 8.75 (d,

$J_{\text{HH}}$  8.1 Hz, 2H), 8.45 (m, 2H), 8.27 (d,  $J_{\text{HH}}$  7.9 Hz, 2H), 8.01 (d,  $J_{\text{HH}}$  8.4 Hz, 4H), 7.82–7.67 (m, 14H), 7.58 (m, 2H), 7.41–7.35 (m, 4H), 7.23 (m, 2H). ESI<sup>+</sup> MS (m/z): [M+H]<sup>+</sup> 965.34 (calcd. 965.34). Anal. Calcd for C<sub>70</sub>H<sub>40</sub>N<sub>6</sub> (red): C, 87.11; H, 4.18; N, 8.71. Found: C, 87.43; H, 4.10; N, 8.39. Anal. Calcd for C<sub>70</sub>H<sub>40</sub>N<sub>6</sub> (yellow): C, 87.11; H, 4.18; N, 8.71. Found: C, 87.26; H, 4.32; N, 8.42.

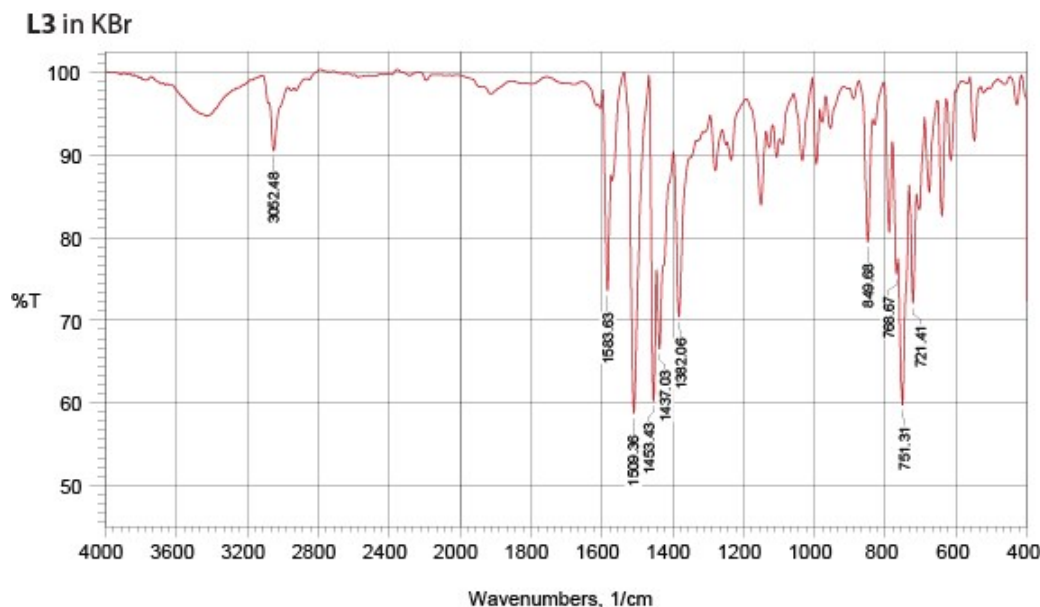

**Zn(L1)Cl<sub>2</sub> (1Cl).** A solution of **L1** (50 mg, 0.13 mmol) in dichloromethane (5 mL) was added to a solution of ZnCl<sub>2</sub> (18 mg, 0.13 mmol) in methanol (3 mL). The reaction mixture was stirred for 2 hours at room temperature to give a pale-yellow suspension. The precipitate was collected, washed with diethyl ether, and dried. The solid residue was recrystallized by a gas-phase diffusion of diethyl ether into a dichloromethane/methanol (form 1) or a chloroform/methanol (form 2) solution of **1Cl** at room temperature to give pale yellow crystalline material (64 mg, 94%, form 2). <sup>1</sup>H NMR (CDCl<sub>3</sub>, 298 K; δ): 9.04 (d,  $J_{\text{HH}}$  8.2 Hz, 1H), 8.91 (d,  $J_{\text{HH}}$  4.6 Hz, 1H), 8.79 (d,  $J_{\text{HH}}$  8.4 Hz, 1H), 8.72 (d,  $J_{\text{HH}}$  8.4 Hz, 1H), 8.00–7.90 (m, 4H), 7.81–7.73 (m, 4H), 7.66–7.59 (m, 2H), 7.30 (m, 1H), 7.01 (d,  $J_{\text{HH}}$  8.4 Hz, 1H), 6.75 (d,  $J_{\text{HH}}$  8.3 Hz, 1H). Anal. Calcd for C<sub>26</sub>H<sub>17</sub>Cl<sub>2</sub>N<sub>3</sub>Zn·CH<sub>2</sub>Cl<sub>2</sub> (**1Cl\_a** dichloromethane solvate, form 1): C, 54.72; H, 3.23; N, 7.09. Found: C, 55.01; H, 3.31; N, 7.26. Anal. Calcd for C<sub>26</sub>H<sub>17</sub>Cl<sub>2</sub>N<sub>3</sub>Zn·0.5CHCl<sub>3</sub> (**1Cl\_b** chloroform solvate, form 2): C, 56.09; H, 3.11; N, 7.40. Found: 56.26; H, 3.16; N, 7.45.

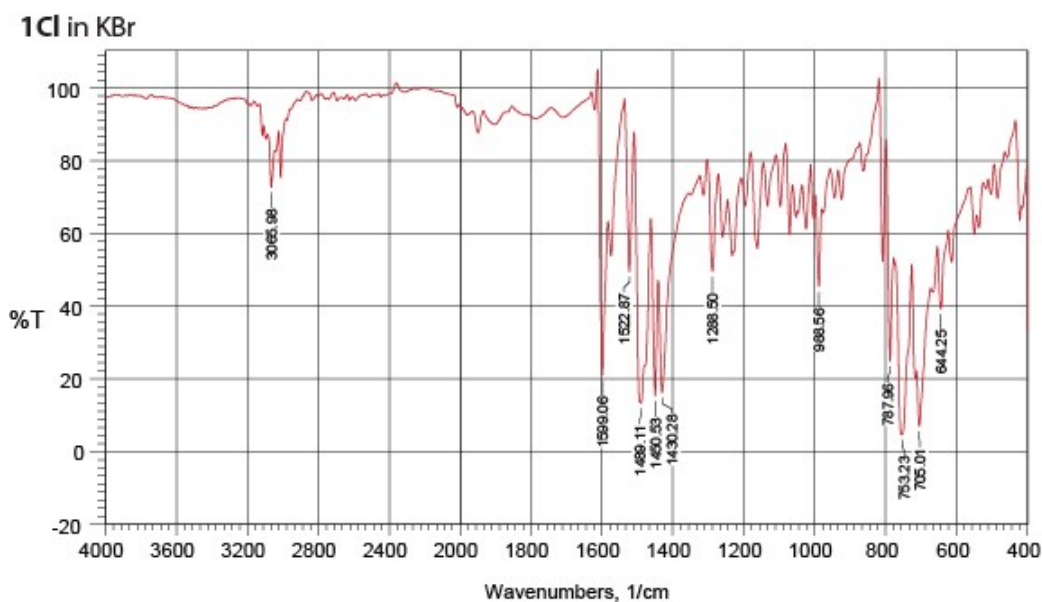

**Zn(L1)I<sub>2</sub> (II).** A solution of **L1** (50 mg, 0.13 mmol) in dichloromethane (5 mL) was added to a suspension of ZnI<sub>2</sub> (43 mg, 0.13 mmol) in diethyl ether (7 mL). The resulting mixture turned transparent yellowish solution, which was stirred for 2 hours at room temperature to give a pale-yellow suspension. The precipitate was collected, washed with diethyl ether and dried. The solid residue was recrystallized by a gas-phase diffusion of diethyl ether into a dichloromethane (form 1) or a chloroform (form 2) solution of **II** at room temperature to give pale yellow crystalline material (90 mg, 97%, form 2). <sup>1</sup>H NMR (CDCl<sub>3</sub>, 298 K; δ): 9.20 (d, *J*<sub>HH</sub> 8.2 Hz, 1H), 8.92 (d, *J*<sub>HH</sub> 4.7 Hz, 1H), 8.79 (d, *J*<sub>HH</sub> 8.4 Hz, 1H), 8.72 (d, *J*<sub>HH</sub> 8.4 Hz, 1H), 8.00–7.90 (m, 4H), 7.82–7.73 (m, 4H), 7.66–7.59 (m, 2H), 7.30 (m, 1H), 7.01 (d, *J*<sub>HH</sub> 8.4 Hz, 1H), 6.71 (d, *J*<sub>HH</sub> 8.3 Hz, 1H). Anal. Calcd for C<sub>26</sub>H<sub>17</sub>I<sub>2</sub>N<sub>3</sub>Zn (dichloromethane solvate, form **II\_a**): C, 45.22; H, 2.48; N, 6.08. Found: C, 44.93; H, 2.48; N, 6.11. Anal. Calcd for C<sub>26</sub>H<sub>17</sub>I<sub>2</sub>N<sub>3</sub>Zn (solvent free form **II\_b**): C, 45.22; H, 2.48; N, 6.08. Found: C, 45.33; H, 2.66; N, 5.85.

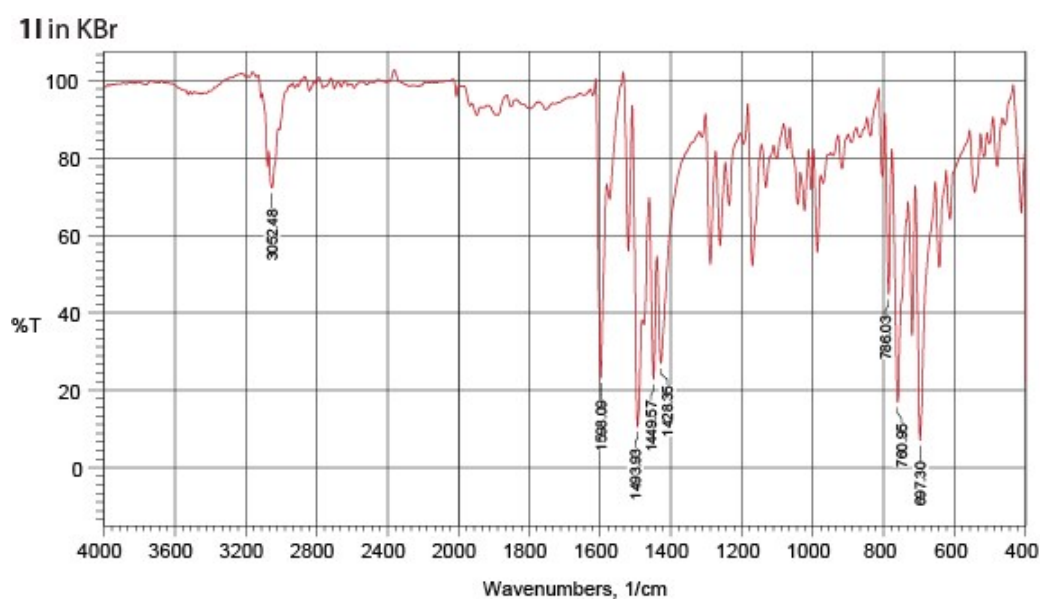

**Zn(L1)(OAc)<sub>2</sub> (10Ac)**. Prepared similarly to **1Cl** using Zn(OAc)<sub>2</sub>·2H<sub>2</sub>O (30 mg, 0.13 mmol) instead of ZnCl<sub>2</sub> to give a clear pale yellow solution. After removing the solvent under reduced pressure, the residue was recrystallized by a gas-phase diffusion of diethyl ether into a chloroform solution of **10Ac** at room temperature to give pale yellow crystalline material (64 mg, 80%). <sup>1</sup>H NMR (CDCl<sub>3</sub>, 298 K; δ): 9.18–9.13 (m, 2H), 8.78 (d, *J*<sub>HH</sub> 8.4 Hz, 1H), 8.70 (d, *J*<sub>HH</sub> 8.3 Hz, 1H), 7.97–7.85 (m, 4H), 7.79–7.72 (m, 3H), 7.68 (t, *J*<sub>HH</sub> 7.9 Hz, 1H), 7.61 (t, *J*<sub>HH</sub> 7.7 Hz, 1H), 7.53 (m, 1H), 7.30 (m, 1H), 7.01 (d, *J*<sub>HH</sub> 8.3 Hz, 1H), 6.70 (d, *J*<sub>HH</sub> 8.2 Hz, 1H), 2.09 (s, 6H). Anal. Calcd for C<sub>30</sub>H<sub>23</sub>O<sub>4</sub>N<sub>3</sub>Zn: C, 64.93; H, 4.18; N, 7.57. Found: C, 64.86; H, 4.31; N, 7.53.

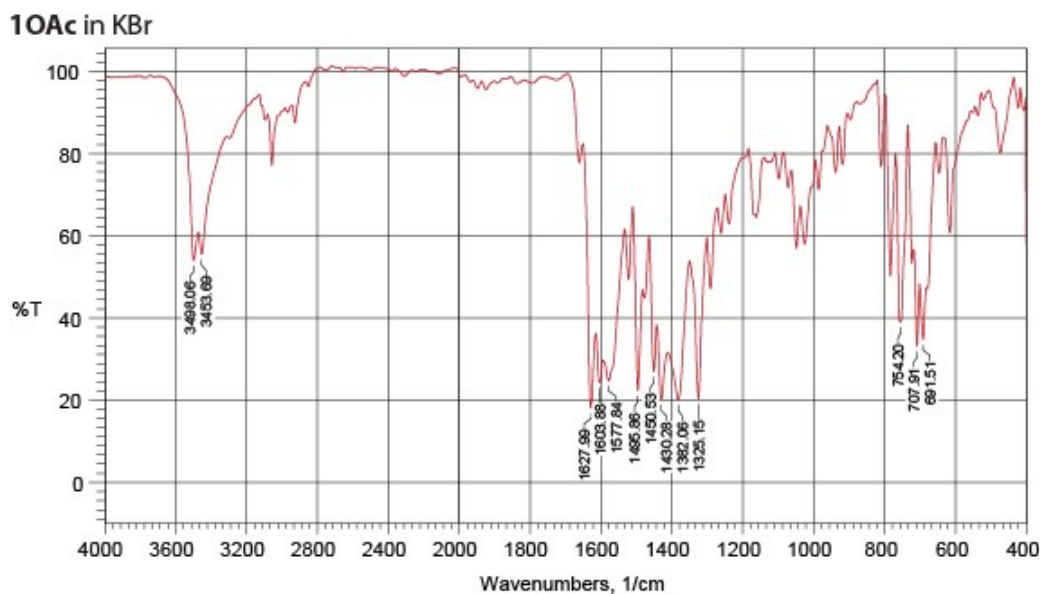

**Zn(L2)Cl<sub>2</sub> (2Cl)**. A solution of **L2** (50 mg, 0.09 mmol) in dichloromethane (5 mL) was added to a solution of ZnCl<sub>2</sub> (12 mg, 0.09 mmol) in methanol (3 mL). The reaction mixture was stirred for 30 minutes at room temperature to give a yellow suspension. The precipitate was collected, washed with diethyl ether and dried. The solid residue was recrystallized by a gas-phase diffusion of pentane into a dichloromethane solution of **2Cl** at room temperature to give yellow crystalline material (58 mg, 93%). <sup>1</sup>H NMR (CDCl<sub>3</sub>, 298 K; δ): 9.06 (d, *J*<sub>HH</sub> 8.2 Hz, 1H), 8.93 (d, *J*<sub>HH</sub> 4.7 Hz, 1H), 8.82 (d, *J*<sub>HH</sub> 8.4 Hz, 1H), 8.74 (m, 3H), 8.59 (s, 1H), 8.28 (d, *J*<sub>HH</sub> 8.4 Hz, 2H), 8.12 (d, *J*<sub>HH</sub> 8.4 Hz, 2H), 7.95 (t, *J*<sub>HH</sub> 7.4 Hz, 1H), 7.91 – 7.79 (m, 4H), 7.74 – 7.59 (m, 6H), 7.42 (t, *J*<sub>HH</sub> 7.8 Hz, 1H), 7.22 (d, *J*<sub>HH</sub> 8.3 Hz, 1H), 6.95 (d, *J*<sub>HH</sub> 8.2 Hz, 1H). Anal. Calcd for C<sub>42</sub>H<sub>25</sub>Cl<sub>2</sub>N<sub>3</sub>Zn: C, 71.25; H, 3.56; N, 5.94. Found: C, 70.84; H, 3.56; N, 5.95.

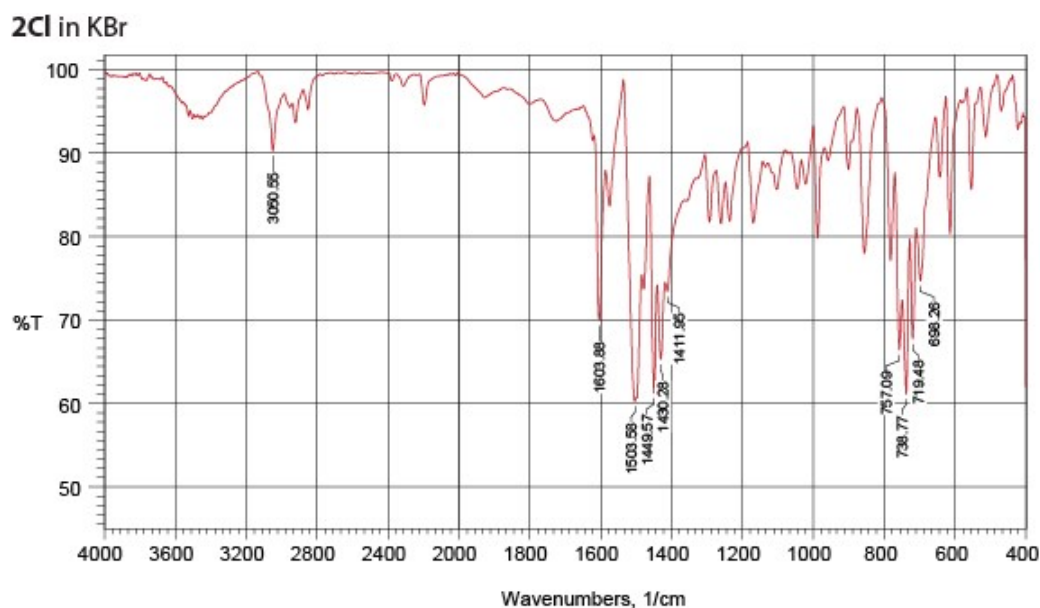

**Zn(L2)I<sub>2</sub> (2I).** A solution of **L2** (50 mg, 0.09 mmol) in dichloromethane (5 mL) was added to a suspension of ZnI<sub>2</sub> (28 mg, 0.09 mmol) in diethyl ether (7 mL). The resulting solution was stirred for 30 minutes at room temperature to give a yellow suspension. The precipitate was collected, washed with diethyl ether and dried. The solid residue was recrystallized by a gas-phase diffusion of diethyl ether into a chloroform/methanol solution of **2I** at room temperature to give orange crystalline material (75 mg, 96%). <sup>1</sup>H NMR (CDCl<sub>3</sub>, 298 K; δ): 9.22 (d, *J*<sub>HH</sub> 8.1 Hz, 1H), 8.95 (d, *J*<sub>HH</sub> 5.0 Hz, 1H), 8.82 (d, *J*<sub>HH</sub> 8.4 Hz, 1H), 8.74 (m, 3H), 8.59 (s, 1H), 8.28 (d, *J*<sub>HH</sub> 8.2 Hz, 2H), 8.12 (d, *J*<sub>HH</sub> 8.3 Hz, 2H), 7.96 (t, *J*<sub>HH</sub> 7.4 Hz, 1H), 7.89 – 7.80 (m, 4H), 7.73 – 7.59 (m, 6H), 7.42 (t, *J*<sub>HH</sub> 7.8 Hz, 1H), 7.22 (m, 1H), 6.94 (d, *J*<sub>HH</sub> 8.3 Hz, 1H). Anal. Calcd for C<sub>42</sub>H<sub>25</sub>I<sub>2</sub>N<sub>3</sub>Zn·0.5CHCl<sub>3</sub>: C, 53.70; H, 2.70; N, 4.2. Found: C, 53.95; H, 2.88; N, 4.46.

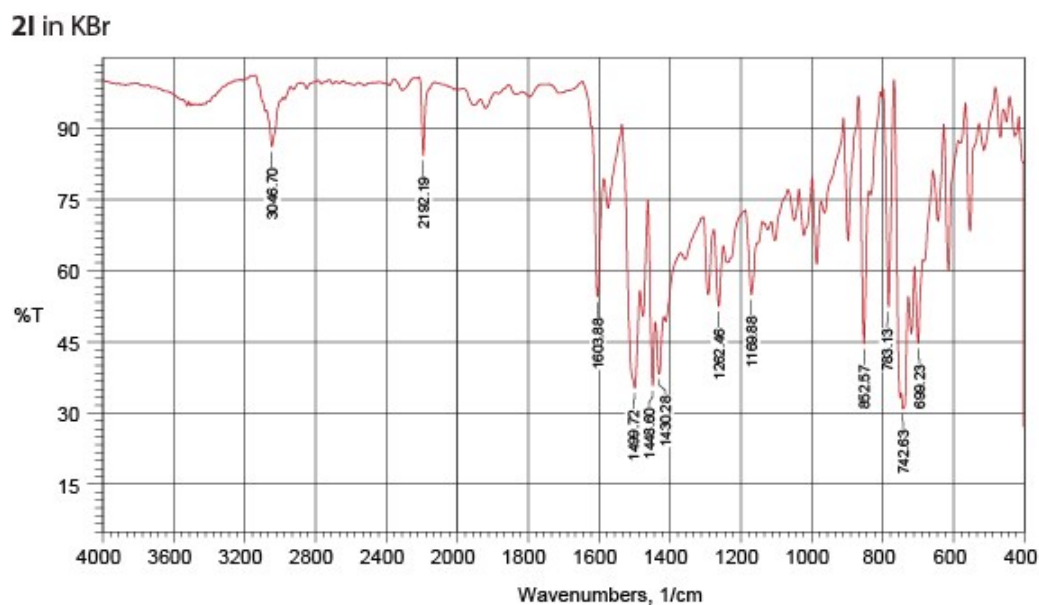

**Zn(L2)(OAc)<sub>2</sub> (2OAc)**. Prepared similarly to **2Cl** using Zn(OAc)<sub>2</sub>·2H<sub>2</sub>O (19 mg, 0.09 mmol) instead of ZnCl<sub>2</sub> to give a clear yellow solution. After removing the solvent under reduced pressure, the residue was recrystallized by a gas-phase diffusion of pentane into dichloromethane solution of **2OAc** at room temperature to give yellow microcrystalline material (54 mg, 82%). <sup>1</sup>H NMR (CDCl<sub>3</sub>, 298 K; δ): 9.23–9.14 (m, 2H), 8.81 (d, *J*<sub>HH</sub> 8.4 Hz, 1H), 8.75–8.71 (m, 3H), 8.58 (s, 1H), 8.23 (d, *J*<sub>HH</sub> 8.2 Hz, 2H), 8.11 (d, *J*<sub>HH</sub> 8.4 Hz, 2H), 7.97 (t, *J*<sub>HH</sub> 7.4 Hz, 1H), 7.83 – 7.56 (m, 11H), 7.39 (t, *J*<sub>HH</sub> 7.8 Hz, 1H), 7.22 (d, *J*<sub>HH</sub> 8.2 Hz, 1H), 6.92 (d, *J*<sub>HH</sub> 7.9 Hz, 1H), 2.09 (s, 6H). Anal. Calcd for C<sub>46</sub>H<sub>31</sub>O<sub>4</sub>N<sub>3</sub>Zn·CH<sub>2</sub>Cl<sub>2</sub>: C, 67.20; H, 3.96; N, 5.00. Found: C, 67.41; H, 4.04; N, 5.17.

**2OAc** in KBr

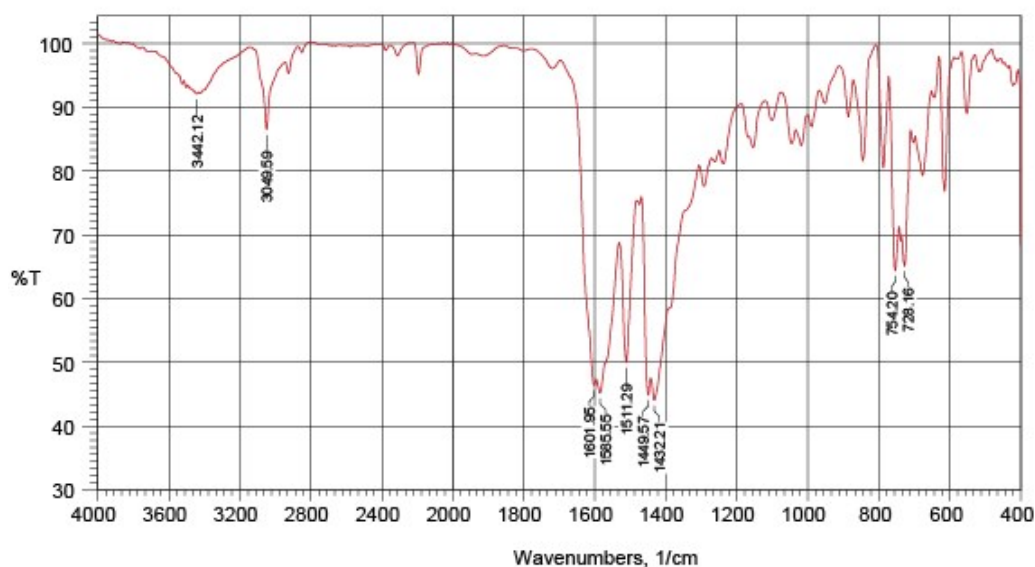

**Zn<sub>2</sub>(L3)(OAc)<sub>4</sub> (3OAc)**. A suspension of **L3** (50 mg, 0.05 mmol) in dichloromethane (7 mL) was treated with a solution of Zn(OAc)<sub>2</sub>·2H<sub>2</sub>O (23 mg, 0.10 mmol) in methanol (3 mL). The resulting mixture was stirred for 2 hours at room temperature to give a clear lemon-greenish solution. After removing the solvent under reduced pressure, the residue was dissolved in dichloromethane and separated into portions. Slow evaporation of a dichloromethane-ethanol solution of **3OAc** at room temperature afforded red microcrystalline material (**3OAc<sub>r</sub>**). Gas-phase diffusion of pentane into a dichloromethane-methanol solution of **3OAc** at room temperature afforded yellow microcrystalline material (**3OAc<sub>y</sub>**), total yield 52 mg (75%). The yellow crystals of the minor form **3OAc<sub>y<sub>cr</sub></sub>** suitable for XRD analysis were obtained at room temperature by a slow evaporation of a chloroform-methanol solution of **3OAc** at +5 °C. <sup>1</sup>H NMR (CDCl<sub>3</sub>, 298 K; δ): 9.23–9.14 (m, 4H), 8.86–8.82 (m, 6H), 8.73 (d, *J*<sub>HH</sub> 8.1 Hz, 2H), 8.28 (m, 4H), 7.98 (m, 2H), 7.88–7.80 (m, 12H), 7.66 (m, 2H), 7.59 (m, 2H), 7.40 (m, 2H), 7.22 (m, 2H), 6.93 (d, *J*<sub>HH</sub> 7.2 Hz, 2H), 2.10 (s, 12H). Anal. Calcd for C<sub>78</sub>H<sub>52</sub>O<sub>8</sub>N<sub>6</sub>Zn<sub>2</sub>·CH<sub>3</sub>OH: C, 69.56; H, 4.14; N, 6.16. Found: C, 69.32; H, 4.12; N, 6.65.



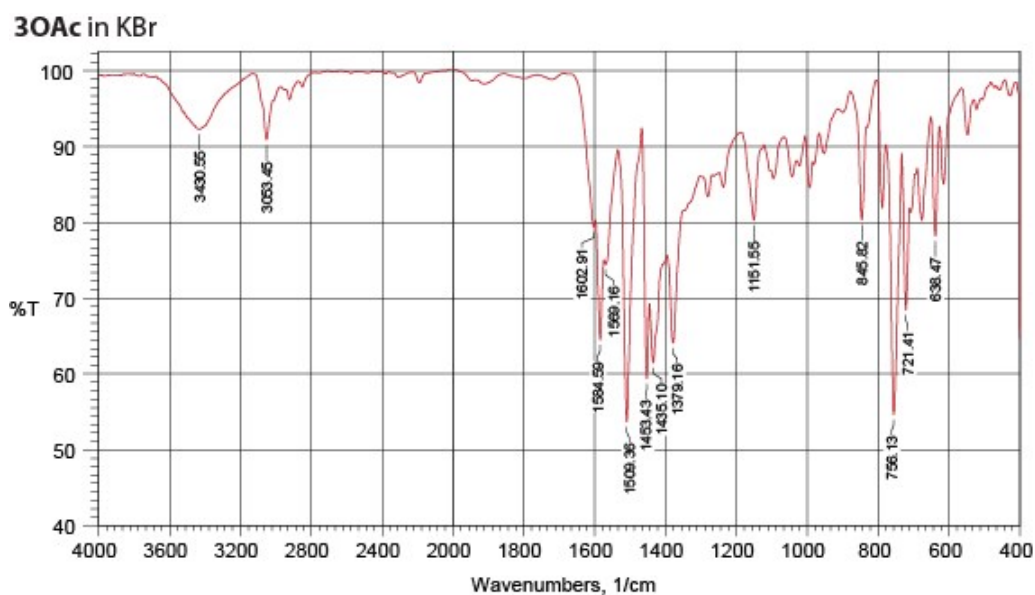

**X-ray structure determinations and powder measurements.** The crystals of **L3\_y**, **1Cl**, **1I**, **1OAc**, **2Cl**, **2I**, **3OAc\_y** were immersed in cryo-oil, mounted in a Nylon loop, and measured at a temperature of 150 K. The crystal of **1I** was also measured at variable temperature (210, 240, 270, 298 K). The X-ray diffraction data were collected with Bruker Kappa Apex II, Smart Apex II and Kappa Apex II Duo diffractometers using Mo K $\alpha$  ( $\lambda = 0.71073$  Å) radiation. The *APEX2*<sup>3</sup> program package was used for cell refinements and data reductions. A numerical or semi-empirical absorption correction (*SADABS*)<sup>4</sup> was applied to all data. The structures were solved by direct methods using the *SHELXS*-2018<sup>5</sup> program with the *WinGX*<sup>6</sup> graphical user interface. Structural refinements were carried out using *SHELXL*-2018.<sup>5</sup>

The crystallization solvent molecules in **L3**, **1OAc**, **2Cl**, **3OAc\_y** could not be resolved unambiguously. The contribution of the missing solvent to the calculated structure factors was taken into account by using a *SQUEEZE* routine<sup>7</sup> of *PLATON*.<sup>8</sup> The missing solvent was not taken into account in the unit cell content. All non-H atoms were anisotropically refined, and all hydrogen atoms were positioned geometrically and constrained to ride on their respective parent atoms with C–H = 0.95–1.00 Å and  $U_{\text{iso}} = 1.2\text{--}1.5U_{\text{eq}}$  (parent atom). The crystallographic details are summarized in Table S1.

Powder XRD patterns were recorded with a Bruker Advance D8 and Rigaku Ultima IV diffractometers using Cu K $\alpha$  (1.54184 Å) radiation source (Bruker: 40 kV/ 40 mA; Rigaku: 40 kV/ 30 mA). Divergence and receiving slits of 1.0 (Bruker) or 0.5 (Rigaku) mm were used together with Ni filter (Bruker) in the measurements. Prior to measurement, a sample was placed on a Si-single crystal zero background sample holder. The diffraction patterns were scanned from 5<sup>o</sup> to 90<sup>o</sup> (Bruker)

or  $3^\circ$  to  $60^\circ$  (Rigaku) in two theta scale using locked couple technique in Bragg-Brentano geometry. Collection time of 2 seconds was used together with a step size of  $0.02^\circ$  per step.

**Photophysical Measurements.** UV–vis absorption spectra were recorded on a Shimadzu UV-1800 spectrophotometer. The excitation and emission spectra in solution (1,2-dichloroethane, DCE) and in the solid state were recorded with a HORIBA FluoroMax-4 spectrofluorometer. The excited state lifetimes and the absolute photoluminescence quantum yields in the solid phase were performed on a HORIBA Scientific FluoroLog-3 spectrofluorometer using a HORIBA Quanta-phi integration sphere. Helium-nitrogen optical cryostat optCryo 105 with temperature control system were used for cooling the samples in the temperature range 78–295 K. A pulse laser DTL-399QT “Laser-export Co. Ltd” (351 nm, 50 mW, pulse width 6 ns, repetition rate 1 kHz), a monochromator MUM (LOMO, slit bandwidth 1 nm), photon counting head H10682 (Hamamatsu) and a multiple-event time digitizer P7887 (FAST ComTec GmbH) were used for lifetime measurements in the temperature range 78–295 K. The uncertainty of the quantum yield determinations was in the range of  $\pm 5\%$  (an average of three replications, which correspond to different orientations of the sample). The emission quantum yield in solutions was determined by the comparative method using coumarin 102 in ethanol ( $\Phi_r = 0.764$ )<sup>9</sup> with refraction indexes of dichloroethane and ethanol equal to 1.4448 and 1.3614, respectively. For measurement of the excited state lifetime of phosphorescence band for **II**, argon gas was bubbled through the solution of **II** in 1,2-dichloroethane ( $c = 10^{-5}$  M) for 10 min. at room temperature for deaeration. The decay was monitored at 560 nm ( $\lambda_{exc} = 351$  nm).

**Computational details.** Density functional theory calculations were performed with Gaussian 16<sup>10</sup> software package using the PBE0<sup>11</sup> hybrid functional and a D3-BJ<sup>12-13</sup> empirical dispersion correction. A def2-TZVPPD<sup>14</sup> basis set was used for the zinc and iodine atoms, while the lighter atoms were treated with a 6-311+G(d,p) basis set. All models were optimized without any constraints. Excited state structures were optimized with TD-DFT. Frequency calculations were also performed for each optimized structure to confirm the nature of the stationary points. Solvation effects were considered by running the calculations in a chloroform solvent using the C-PCM<sup>15-16</sup> solvation model, as implemented in Gaussian.

**Table S1.** Predicted (PBE0) low energy excitations for complexes **1X–3X** and **L3** in chloroform.

|             | <b>Transition</b>     | $\lambda_{\text{calc}}$ , nm | $f$               | <b>MO contribution</b>                                 |
|-------------|-----------------------|------------------------------|-------------------|--------------------------------------------------------|
| <b>1Cl</b>  | $S_0 \rightarrow S_1$ | 372                          | 0.62              | 99% HOMO $\rightarrow$ LUMO                            |
|             | $S_0 \rightarrow S_2$ | 331                          | 0.02              | 95% H-1 $\rightarrow$ LUMO                             |
|             | $S_0 \rightarrow S_3$ | 307                          | 0.02              | 43% HOMO $\rightarrow$ L+1, 40% HOMO $\rightarrow$ L+2 |
|             | $S_0 \rightarrow S_4$ | 299                          | 0.06              | 51% HOMO $\rightarrow$ L+1, 37% HOMO $\rightarrow$ L+2 |
| <b>1I</b>   | $S_0 \rightarrow S_1$ | 376                          | 0.54              | 98% HOMO $\rightarrow$ LUMO                            |
|             | $S_0 \rightarrow S_2$ | 356                          | 0.002             | 100% H-1 $\rightarrow$ LUMO                            |
|             | $S_0 \rightarrow S_3$ | 347                          | 0.06              | 93% H-2 $\rightarrow$ LUMO                             |
|             | $S_0 \rightarrow S_4$ | 342                          | 0.006             | 94% H-3 $\rightarrow$ LUMO                             |
| <b>1OAc</b> | $S_0 \rightarrow S_1$ | 367                          | 0.56              | 98% HOMO $\rightarrow$ LUMO                            |
|             | $S_0 \rightarrow S_2$ | 321                          | 0.01              | 82% H-1 $\rightarrow$ LUMO, 10% HOMO $\rightarrow$ L+2 |
|             | $S_0 \rightarrow S_3$ | 310                          | 0.02              | 40% HOMO $\rightarrow$ L+2, 36% HOMO $\rightarrow$ L+1 |
|             | $S_0 \rightarrow S_4$ | 310                          | 0.02              | 93% H-2 $\rightarrow$ LUMO                             |
|             | $S_0 \rightarrow S_5$ | 299                          | 0.06              | 53% HOMO $\rightarrow$ L+1, 35% HOMO $\rightarrow$ L+2 |
| <b>2Cl</b>  | $S_0 \rightarrow S_1$ | 451                          | 0.65              | 99% HOMO $\rightarrow$ LUMO                            |
|             | $S_0 \rightarrow S_2$ | 406                          | $10^{-4}$         | 99% HOMO $\rightarrow$ L+1                             |
|             | $S_0 \rightarrow S_3$ | 374                          | 0.61              | 97% H-1 $\rightarrow$ L+1                              |
| <b>2I</b>   | $S_0 \rightarrow S_1$ | 451                          | 0.66              | 99% HOMO $\rightarrow$ LUMO                            |
|             | $S_0 \rightarrow S_2$ | 407                          | $3 \cdot 10^{-4}$ | 99% HOMO $\rightarrow$ L+1                             |
|             | $S_0 \rightarrow S_3$ | 376                          | 0.52              | 94% H-1 $\rightarrow$ L+1                              |
|             | $S_0 \rightarrow S_4$ | 367                          | 0.01              | 92% H-1 $\rightarrow$ LUMO                             |
| <b>2OAc</b> | $S_0 \rightarrow S_1$ | 450                          | 0.64              | 99% HOMO $\rightarrow$ LUMO                            |
|             | $S_0 \rightarrow S_2$ | 384                          | 0.002             | 99% HOMO $\rightarrow$ L+1                             |
|             | $S_0 \rightarrow S_3$ | 378                          | 0.12              | 85% H-1 $\rightarrow$ LUMO, 13% H-1 $\rightarrow$ L+1  |
|             | $S_0 \rightarrow S_4$ | 364                          | 0.43              | 85% H-1 $\rightarrow$ L+1, 12% H-1 $\rightarrow$ LUMO  |
| <b>L3</b>   | $S_0 \rightarrow S_1$ | 524                          | 1.38              | 99% HOMO $\rightarrow$ LUMO                            |
| <b>3OAc</b> | $S_0 \rightarrow S_1$ | 525                          | 1.37              | 99% HOMO $\rightarrow$ LUMO                            |

**Table S2.** Predicted (PBE0) emissions parameters for complexes **1X–3X** and **L3** in chloroform.

| Complex     | Transition            | $\lambda_{\text{calc}}$ , nm | $E_{\text{calc}}$ , eV | $f$   | Assignment       |
|-------------|-----------------------|------------------------------|------------------------|-------|------------------|
| <b>1Cl</b>  | $S_1 \rightarrow S_0$ | 425                          | 2.9                    | 0.694 | ILCT/ $\pi\pi^*$ |
| <b>1I</b>   |                       | 429                          | 2.9                    | 0.566 | ILCT/ $\pi\pi^*$ |
| <b>1I</b>   | $T_1 \rightarrow S_0$ | 681                          | 1.8                    | -     | ILCT/ $\pi\pi^*$ |
| <b>1OAc</b> | $S_1 \rightarrow S_0$ | 423                          | 2.9                    | 0.647 | ILCT/ $\pi\pi^*$ |
| <b>2Cl</b>  |                       | 521                          | 2.4                    | 0.658 | $\pi\pi^*$       |
| <b>2I</b>   | $S_1 \rightarrow S_0$ | 521                          | 2.4                    | 0.668 | $\pi\pi^*$       |
| <b>2OAc</b> |                       | 520                          | 2.4                    | 0.651 | $\pi\pi^*$       |
| <b>3OAc</b> |                       | 607                          | 2.0                    | 1.381 | $\pi\pi^*$       |
| <b>L3</b>   |                       | 607                          | 2.0                    | 1.388 | $\pi\pi^*$       |

**Table S3.** Crystal data and structure refinement for ligand **L3**, and zinc complexes **1Cl**, **1I**, **1OAc**, **2Cl**, **2I**, **3OAc\_y**.

| Identification code                    | L3_y <sub>cr</sub>                             | 1I_a                                                                             | 1Cl_a                                                             | 1Cl_b                                                                          | 1OAc                                                                          | 2I                                                                               | 2Cl                                                               | 3OAc_y                                                                        |
|----------------------------------------|------------------------------------------------|----------------------------------------------------------------------------------|-------------------------------------------------------------------|--------------------------------------------------------------------------------|-------------------------------------------------------------------------------|----------------------------------------------------------------------------------|-------------------------------------------------------------------|-------------------------------------------------------------------------------|
| CCDC                                   | 2060309                                        | 2060304                                                                          | 2060299                                                           | 2060300                                                                        | 2060311                                                                       | 2060306                                                                          | 2060310                                                           | 2060308                                                                       |
| Empirical formula                      | C <sub>70</sub> H <sub>40</sub> N <sub>6</sub> | C <sub>27</sub> H <sub>19</sub> Cl <sub>2</sub> I <sub>2</sub> N <sub>3</sub> Zn | C <sub>27</sub> H <sub>19</sub> Cl <sub>4</sub> N <sub>3</sub> Zn | C <sub>53</sub> H <sub>35</sub> Cl <sub>7</sub> N <sub>6</sub> Zn <sub>2</sub> | C <sub>60</sub> H <sub>48</sub> N <sub>6</sub> O <sub>9</sub> Zn <sub>2</sub> | C <sub>43</sub> H <sub>26</sub> Cl <sub>3</sub> I <sub>2</sub> N <sub>3</sub> Zn | C <sub>42</sub> H <sub>25</sub> Cl <sub>2</sub> N <sub>3</sub> Zn | C <sub>78</sub> H <sub>52</sub> N <sub>6</sub> O <sub>8</sub> Zn <sub>2</sub> |
| Formula weight                         | 965.08                                         | 775.52                                                                           | 592.62                                                            | 1134.76                                                                        | 1127.78                                                                       | 1009.18                                                                          | 707.92                                                            | 1331.99                                                                       |
| Temperature (K)                        |                                                |                                                                                  |                                                                   |                                                                                | 150(2)                                                                        |                                                                                  |                                                                   |                                                                               |
| Wavelength (Å)                         | 0.71073                                        | 0.71073                                                                          | 0.71073                                                           | 0.71073                                                                        | 0.71073                                                                       | 0.71073                                                                          | 0.71073                                                           | 0.71073                                                                       |
| Crystal system                         | Triclinic                                      | Triclinic                                                                        | Monoclinic                                                        | Orthorhombic                                                                   | Triclinic                                                                     | Orthorhombic                                                                     | Monoclinic                                                        | Triclinic                                                                     |
| Space group                            | <i>P</i> $\bar{1}$                             | <i>P</i> $\bar{1}$                                                               | <i>P</i> 2 <sub>1</sub> / <i>c</i>                                | <i>Pbcn</i>                                                                    | <i>P</i> $\bar{1}$                                                            | <i>Pna</i> 2 <sub>1</sub>                                                        | <i>P</i> 2 <sub>1</sub> / <i>c</i>                                | <i>P</i> $\bar{1}$                                                            |
| Unit cell dimensions                   |                                                |                                                                                  |                                                                   |                                                                                |                                                                               |                                                                                  |                                                                   |                                                                               |
| a (Å)                                  | 8.8354(6)                                      | 8.9526(8)                                                                        | 11.9425(7)                                                        | 31.926(3)                                                                      | 10.2600(19)                                                                   | 20.2544(13)                                                                      | 19.0446(19)                                                       | 7.8436(11)                                                                    |
| b (Å)                                  | 9.8627(7)                                      | 12.4604(11)                                                                      | 10.5173(7)                                                        | 9.5574(7)                                                                      | 11.153(2)                                                                     | 15.5170(11)                                                                      | 10.5617(10)                                                       | 16.577(3)                                                                     |
| c (Å)                                  | 15.8345(11)                                    | 13.1177(11)                                                                      | 20.1014(13)                                                       | 15.8596(10)                                                                    | 11.593(2)                                                                     | 12.0814(7)                                                                       | 20.9281(19)                                                       | 16.591(2)                                                                     |
| a (°)                                  | 90.013(2)                                      | 91.271(4)                                                                        | 90.000(0)                                                         | 90.000(0)                                                                      | 74.507(6)                                                                     | 90.000(0)                                                                        | 90.000(0)                                                         | 84.069(4)                                                                     |
| β (°)                                  | 100.607(2)                                     | 105.489(4)                                                                       | 91.8770(10)                                                       | 90.000(0)                                                                      | 76.974(7)                                                                     | 90.000(0)                                                                        | 94.074(3)                                                         | 83.755(4)                                                                     |
| γ (°)                                  | 91.344(2)                                      | 105.098(4)                                                                       | 90.000(0)                                                         | 90.000(0)                                                                      | 80.014(6)                                                                     | 90.000(0)                                                                        | 90.000(0)                                                         | 89.027(4)                                                                     |
| Volume (Å <sup>3</sup> )               | 1355.87(16)                                    | 1354.9(2)                                                                        | 2523.4(3)                                                         | 4839.2(7)                                                                      | 1236.4(4)                                                                     | 3797.0(4)                                                                        | 4198.9(7)                                                         | 2132.9(5)                                                                     |
| Z                                      | 1                                              | 2                                                                                | 4                                                                 | 4                                                                              | 1                                                                             | 4                                                                                | 4                                                                 | 1                                                                             |
| ρ <sub>calc</sub> (Mg/m <sup>3</sup> ) | 1.182                                          | 1.901                                                                            | 1.560                                                             | 1.558                                                                          | 1.515                                                                         | 1.767                                                                            | 1.120                                                             | 1.037                                                                         |
| μ (mm <sup>-1</sup> )                  | 0.070                                          | 3.404                                                                            | 1.419                                                             | 1.423                                                                          | 1.039                                                                         | 2.520                                                                            | 0.741                                                             | 0.611                                                                         |
| F(000)                                 | 502                                            | 744                                                                              | 1200                                                              | 2296                                                                           | 582                                                                           | 1968                                                                             | 1448                                                              | 686                                                                           |
| Crystal size (mm <sup>3</sup> )        | 0.268 × 0.163 ×<br>0.086                       | 0.334 × 0.080 ×<br>0.053                                                         | 0.709 × 0.314 ×<br>0.275                                          | 0.303 × 0.083 ×<br>0.061                                                       | 0.497 × 0.193 ×<br>0.076                                                      | 0.194 × 0.062 ×<br>0.041                                                         | 0.275 × 0.157 ×<br>0.130                                          | 0.168 × 0.107 ×<br>0.038                                                      |
| θ range for data collection (°)        | 1.308 to 27.499                                | 1.619 to 29.998                                                                  | 2.186 to 29.999                                                   | 1.276 to 29.994                                                                | 1.856 to 30.999                                                               | 1.653 to 29.998                                                                  | 1.072 to 26.999                                                   | 1.241 to 25.049                                                               |

|                                                     |                                             |                                          |                                          |                                          |                                          |                                          |                                          |                                        |
|-----------------------------------------------------|---------------------------------------------|------------------------------------------|------------------------------------------|------------------------------------------|------------------------------------------|------------------------------------------|------------------------------------------|----------------------------------------|
| Index ranges                                        | -11<=h<=11,<br>-12<=k<=12,<br>-20<=l<=20    | -12<=h<=12,<br>-17<=k<=17,<br>-18<=l<=18 | -16<=h<=11,<br>-14<=k<=13,<br>-26<=l<=28 | -38<=h<=44,<br>-13<=k<=13,<br>-14<=l<=22 | -14<=h<=14,<br>-16<=k<=16,<br>-16<=l<=16 | -28<=h<=23,<br>-17<=k<=21,<br>-16<=l<=16 | -24<=h<=24,<br>-13<=k<=13,<br>-26<=l<=26 | -9<=h<=9,<br>-19<=k<=19,<br>-19<=l<=19 |
| Reflections collected                               | 40903                                       | 71811                                    | 25956                                    | 39007                                    | 54849                                    | 30183                                    | 68472                                    | 62081                                  |
| Independent reflections                             | 6231 [R(int) = 0.0525]                      | 7921 [R(int) = 0.0687]                   | 6790 [R(int) = 0.0189]                   | 7035 [R(int) = 0.0529]                   | 7867 [R(int) = 0.0654]                   | 10315 [R(int) = 0.0386]                  | 9080 [R(int) = 0.0531]                   | 7521 [R(int) = 0.1314]                 |
| Completeness to $\theta = 25.242^\circ$             | 100.0 %                                     | 100.0 %                                  | 100.0 %                                  | 99.5 %                                   | 100.0 %                                  | 99.9 %                                   | 99.6                                     | 99.4 %                                 |
| Absorption correction                               | Semi-empirical from equivalents             | Numerical                                | Numerical                                | Numerical                                | Numerical                                | Semi-empirical from equivalents          | Numerical                                | Numerical                              |
| Max. and min. transmission                          | 0.994 and 0.982                             | 0.840 and 0.396                          | 0.696 and 0.433                          | 0.918 and 0.672                          | 0.925 and 0.626                          | 0.904 and 0.641                          | 0.822 and 0.741                          | 0.977 and 0.904                        |
| Refinement method                                   | Full-matrix least-squares on F <sup>2</sup> |                                          |                                          |                                          |                                          |                                          |                                          |                                        |
| Data/ restraints/ parameters                        | 6231 / 0 / 343                              | 7921 / 0 / 316                           | 6790 / 0 / 316                           | 7035 / 1 / 316                           | 7867 / 0 / 354                           | 10315 / 1 / 469                          | 9080 / 81 / 404                          | 7521 / 30 / 424                        |
| GOOF on F <sup>2</sup>                              | 1.020                                       | 1.033                                    | 1.035                                    | 1.049                                    | 1.043                                    | 1.021                                    | 1.135                                    | 1.055                                  |
| Final R indices [I > 2 $\sigma$ (I)] <sup>a</sup>   | R1 = 0.0542,<br>wR2 = 0.1329                | R1 = 0.0321,<br>wR2 = 0.0748             | R1 = 0.0332,<br>wR2 = 0.0862             | R1 = 0.0454,<br>wR2 = 0.1039             | R1 = 0.0450,<br>wR2 = 0.0863             | R1 = 0.0346,<br>wR2 = 0.0657             | R1 = 0.0940,<br>wR2 = 0.1952             | R1 = 0.1025,<br>wR2 = 0.2040           |
| R indices (all data)                                | R1 = 0.0878,<br>wR2 = 0.1496                | R1 = 0.0427,<br>wR2 = 0.0815             | R1 = 0.0399,<br>wR2 = 0.0899             | R1 = 0.0671,<br>wR2 = 0.1137             | R1 = 0.0671,<br>wR2 = 0.0973             | R1 = 0.0487,<br>wR2 = 0.0703             | R1 = 0.1189,<br>wR2 = 0.2081             | R1 = 0.1500,<br>wR2 = 0.2233           |
| Largest diff. peak and hole (e. $\text{\AA}^{-3}$ ) | 0.666 and -0.226                            | 2.030 and -1.157                         | 1.152 and -1.542                         | 0.955 and -0.926                         | 0.784 and -0.841                         | 0.873 and -0.580                         | 0.945 and -1.350                         | 0.533 and -0.433                       |

<sup>a</sup>  $R_1 = \Sigma ||F_o| - |F_c|| / \Sigma |F_o|$ ;  $wR2 = [\Sigma [w(F_o^2 - F_c^2)^2] / \Sigma [w(F_o^2)^2]]^{1/2}$

**Table S4.** Crystal data and structure refinement for complex **1I\_b** measured at different temperatures.

| Identification code                    | <b>1I_b</b>                                                      |                                                                  |                                                                  |                                                                  |                                                                  |
|----------------------------------------|------------------------------------------------------------------|------------------------------------------------------------------|------------------------------------------------------------------|------------------------------------------------------------------|------------------------------------------------------------------|
| CCDC                                   | 2060302                                                          | 2060303                                                          | 2060301                                                          | 2060307                                                          | 2060305                                                          |
| Empirical formula                      | C <sub>26</sub> H <sub>17</sub> I <sub>2</sub> N <sub>3</sub> Zn | C <sub>26</sub> H <sub>17</sub> I <sub>2</sub> N <sub>3</sub> Zn | C <sub>26</sub> H <sub>17</sub> I <sub>2</sub> N <sub>3</sub> Zn | C <sub>26</sub> H <sub>17</sub> I <sub>2</sub> N <sub>3</sub> Zn | C <sub>26</sub> H <sub>17</sub> I <sub>2</sub> N <sub>3</sub> Zn |
| Formula weight                         | 690.59                                                           | 690.59                                                           | 690.59                                                           | 690.59                                                           | 690.59                                                           |
| Temperature (K)                        | 150(2)                                                           | 210(2)                                                           | 240(2)                                                           | 270(2)                                                           | 295(2)                                                           |
| Wavelength (Å)                         | 0.71073                                                          | 0.71073                                                          | 0.71073                                                          | 0.71073                                                          | 0.71073                                                          |
| Crystal system                         | Monoclinic                                                       |                                                                  |                                                                  |                                                                  |                                                                  |
| Space group                            | P2 <sub>1</sub> /c                                               |                                                                  |                                                                  |                                                                  |                                                                  |
| Unit cell dimensions                   |                                                                  |                                                                  |                                                                  |                                                                  |                                                                  |
| a (Å)                                  | 8.4365(7)                                                        | 8.4568(3)                                                        | 8.4628(4)                                                        | 8.4628(4)                                                        | 8.4603(4)                                                        |
| b (Å)                                  | 21.6792(18)                                                      | 21.8093(8)                                                       | 21.8839(10)                                                      | 21.8839(10)                                                      | 21.9109(9)                                                       |
| c (Å)                                  | 13.4196(11)                                                      | 13.4962(5)                                                       | 13.5501(6)                                                       | 13.5501(6)                                                       | 13.5774(6)                                                       |
| a (°)                                  | 90.000(0)                                                        | 90.000(0)                                                        | 90.000(0)                                                        | 90.000(0)                                                        | 90.000(0)                                                        |
| β (°)                                  | 107.913(2)                                                       | 107.8530(10)                                                     | 107.7620(10)                                                     | 107.7620(10)                                                     | 107.7070(10)                                                     |
| γ (°)                                  | 90.000(0)                                                        | 90.000(0)                                                        | 90.000(0)                                                        | 90.000(0)                                                        | 90.000(0)                                                        |
| Volume (Å <sup>3</sup> )               | 2335.4(3)                                                        | 2369.33(15)                                                      | 2389.84(19)                                                      | 2389.84(19)                                                      | 2397.64(18)                                                      |
| Z                                      | 4                                                                | 4                                                                | 4                                                                | 4                                                                | 4                                                                |
| ρ <sub>calc</sub> (Mg/m <sup>3</sup> ) | 1.964                                                            | 1.936                                                            | 1.919                                                            | 1.919                                                            | 1.913                                                            |
| μ (mm <sup>-1</sup> )                  | 3.715                                                            | 3.662                                                            | 3.630                                                            | 3.630                                                            | 3.618                                                            |
| F(000)                                 | 1320                                                             | 1320                                                             | 1320                                                             | 1320                                                             | 1320                                                             |
| Crystal size (mm <sup>3</sup> )        | 0.361 × 0.070 × 0.055                                            |                                                                  | 0.282 × 0.148 × 0.051                                            |                                                                  |                                                                  |
| θ range for data collection (°)        | 1.851 to 25.997                                                  | 1.840 to 26.000                                                  | 1.832 to 25.997                                                  | 1.832 to 25.997                                                  | 1.828 to 26.000                                                  |

|                                                     |                                             |                                          |                                          |                                          |                                          |
|-----------------------------------------------------|---------------------------------------------|------------------------------------------|------------------------------------------|------------------------------------------|------------------------------------------|
| Index ranges                                        | -10<=h<=10,<br>-26<=k<=26,<br>-16<=l<=16    | -10<=h<=10,<br>-26<=k<=26,<br>-16<=l<=16 | -10<=h<=10,<br>-26<=k<=26,<br>-16<=l<=16 | -10<=h<=10,<br>-26<=k<=26,<br>-16<=l<=16 | -10<=h<=10,<br>-27<=k<=27,<br>-16<=l<=16 |
| Reflections collected                               | 38178                                       | 39204                                    | 31866                                    | 31650                                    | 31961                                    |
| Independent reflections                             | 4609 [R(int) = 0.0472]                      | 4662 [R(int) = 0.0424]                   | 4700 [R(int) = 0.0409]                   | 4700 [R(int) = 0.0454]                   | 4711 [R(int) = 0.0463]                   |
| Completeness to $\theta = 25.242^\circ$             | 100.0 %                                     | 100.0 %                                  | 100.0 %                                  | 100.0 %                                  | 100.0 %                                  |
| Absorption correction                               | Semi-empirical from equivalents             | Numerical                                | Numerical                                | Numerical                                | Numerical                                |
| Max. and min. transmission                          | 0.822 and 0.347                             | 0.835 and 0.425                          | 0.837 and 0.428                          | 0.837 and 0.428                          | 0.837 and 0.429                          |
| Refinement method                                   | Full-matrix least-squares on F <sup>2</sup> |                                          |                                          |                                          |                                          |
| Data/ restraints/ parameters                        | 4609 / 0 / 289                              | 4662 / 0 / 289                           | 4700 / 0 / 289                           | 4700 / 0 / 289                           | 4711 / 0 / 289                           |
| GOOF on F <sup>2</sup>                              | 1.024                                       | 1.058                                    | 1.037                                    | 1.025                                    | 1.026                                    |
| Final R indices<br>[I>2 $\sigma$ (I)] <sup>a</sup>  | R1 = 0.0351,<br>wR2 = 0.0783                | R1 = 0.0325,<br>wR2 = 0.0704             | R1 = 0.0341,<br>wR2 = 0.0737             | R1 = 0.0348,<br>wR2 = 0.0778             | R1 = 0.0373,<br>wR2 = 0.0845             |
| R indices (all data)                                | R1 = 0.0450,<br>wR2 = 0.0816                | R1 = 0.0423,<br>wR2 = 0.0741             | R1 = 0.0464,<br>wR2 = 0.0784             | R1 = 0.0511,<br>wR2 = 0.0836             | R1 = 0.0550,<br>wR2 = 0.0903             |
| Largest diff. peak and hole (e. $\text{\AA}^{-3}$ ) | 2.910 and -0.718                            | 2.415 and -0.837                         | 2.439 and -0.992                         | 2.260 and -1.027                         | 2.249 and -0.956                         |

<sup>a</sup>  $R_1 = \Sigma ||F_o| - |F_c|| / \Sigma |F_o|$ ;  $wR2 = [\Sigma [w(F_o^2 - F_c^2)^2] / \Sigma [w(F_o^2)]]^{1/2}$



**Table S5.** Selected bond lengths and angles for complexes **1I**, **1Cl**, **1OAc**, **2Cl**, **2I**, **3OAc\_y**.

|                        | <b>1I_a</b> | <b>1Cl_a</b> | <b>1Cl_b</b> | <b>1OAc</b> | <b>2Cl</b> | <b>2I</b> | <b>3OAc_y</b> |
|------------------------|-------------|--------------|--------------|-------------|------------|-----------|---------------|
| <b>Bond lengths, Å</b> |             |              |              |             |            |           |               |
| Zn–N(1)                | 2.024(2)    | 2.0161(14)   | 2.024(2)     | 2.0847(17)  | 2.019(4)   | 2.055(4)  | 2.090(5)      |
| Zn–N(2)                | 2.075(3)    | 2.0548(15)   | 2.075(2)     | 2.0532(17)  | 2.062(4)   | 2.064(4)  | 2.059(5)      |
| Zn–Cl(1)               | -           | 2.2157(5)    | 2.2167(6)    | -           | 2.2077(16) | –         | -             |
| Zn–Cl(2)               | -           | 2.2069(5)    | 2.2018(7)    | -           | 2.2135(16) | –         | -             |
| Zn–I(1)                | 2.5392(4)   | -            | -            | -           | -          | 2.5638(7) | -             |
| Zn–I(2)                | 2.5469(5)   | -            | -            | -           | -          | 2.5368(7) | -             |
| <b>Bond angles, °</b>  |             |              |              |             |            |           |               |
| N(1)–Zn–N(2)           | 80.75(10)   | 81.16(6)     | 80.73(7)     | 80.73(7)    | 80.69(17)  | 80.42(16) | 79.8(2)       |
| Cl(2)–Zn–Cl(1)         | -           | 116.64(2)    | 118.76(3)    | -           | 116.83(6)  | -         | -             |
| I(2)–Zn–I(1)           | 119.672(16) | -            | -            | -           | –          | 120.74(2) | -             |
| O–Zn–O                 | –           | –            | –            | 107.14(7)   | –          | –         | 105.9(3)      |

**Table S6.** Selected bond lengths and angles for **1I\_b** at different temperatures.

|                        | 150 K     | 210K      | 240K      | 270K      | 295K      |
|------------------------|-----------|-----------|-----------|-----------|-----------|
| <b>Bond lengths, Å</b> |           |           |           |           |           |
| Zn–N(1)                | 2.037(4)  | 2.046(3)  | 2.049(3)  | 2.046(3)  | 2.041(3)  |
| Zn–N(2)                | 2.068(4)  | 2.081(3)  | 2.082(4)  | 2.081(4)  | 2.083(4)  |
| Zn–I(1)                | 2.5468(6) | 2.5434(6) | 2.5517(6) | 2.5418(6) | 2.5405(6) |
| Zn–I(2)                | 2.5358(6) | 2.5497(6) | 2.5482(6) | 2.5474(6) | 2.5443(7) |
| <b>Bond angles, °</b>  |           |           |           |           |           |
| N(1)–Zn–N(2)           | 80.12(14) | 80.15(13) | 80.06(14) | 80.12(14) | 80.01(15) |
| I(2)–Zn–I(1)           | 110.70(2) | 110.78(2) | 110.83(2) | 110.95(2) | 111.05(2) |

**Table S7.** Intermolecular separation ( $d$  I $\cdots\pi_{\text{imi}}$ ), the ratio of intensities of the phosphorescence and fluorescence bands ( $I_p / I_f$ ), observed lifetime of the phosphorescence, and CIE 1931 chromaticity coordinates of the emission for **1I\_b** at different temperatures.

| <i>T</i> , K | $d$ (I $\cdots\pi_{\text{imi}}$ ), Å | $I_p / I_f$ | $\tau_{\text{obs}}$ (600 nm), ns | CIE ( <i>x</i> , <i>y</i> ) |
|--------------|--------------------------------------|-------------|----------------------------------|-----------------------------|
| 295          | 3.572                                | 0.39        | $0.09 \times 10^6$               | 0.222, 0.249                |
| 270          | 3.562                                | 0.44        | $0.1 \times 10^6$                | 0.225, 0.252                |
| 230          | –                                    | 1.12        | $0.5 \times 10^6$                | 0.312, 0.311                |
| 240          | 3.547                                | –           | –                                | –                           |
| 210          | 3.531                                | –           | –                                | –                           |
| 190          | –                                    | 2.24        | $1.3 \times 10^6$                | 0.382, 0.360                |
| 150          | 3.499                                | 2.62        | $1.9 \times 10^6$                | 0.394, 0.371                |
| 110          | –                                    | 2.85        | $2.1 \times 10^6$                | 0.396, 0.376                |
| 77           | –                                    | 2.85        | $2.2 \times 10^6$                | 0.393, 0.376                |

**Table S8.** Emission wavelengths of zinc complexes in solid state before and after mechanical grinding at 298 K.

| complex       | $\lambda_{\text{ems}}$ , nm |                           |
|---------------|-----------------------------|---------------------------|
|               | pristine crystals           | ground sample             |
| <b>2Cl</b>    | 472                         | 532                       |
| <b>2I</b>     | 506, 598                    | 500, 534, 583             |
| <b>2OAc</b>   | 497                         | 494, 524, 573 (drop-cast) |
| <b>L3_y</b>   | 543                         | 575                       |
|               |                             | 598 after heating/vapors  |
| <b>L3_r</b>   | 597                         | 564                       |
| <b>3OAc_r</b> | 611                         | 563                       |

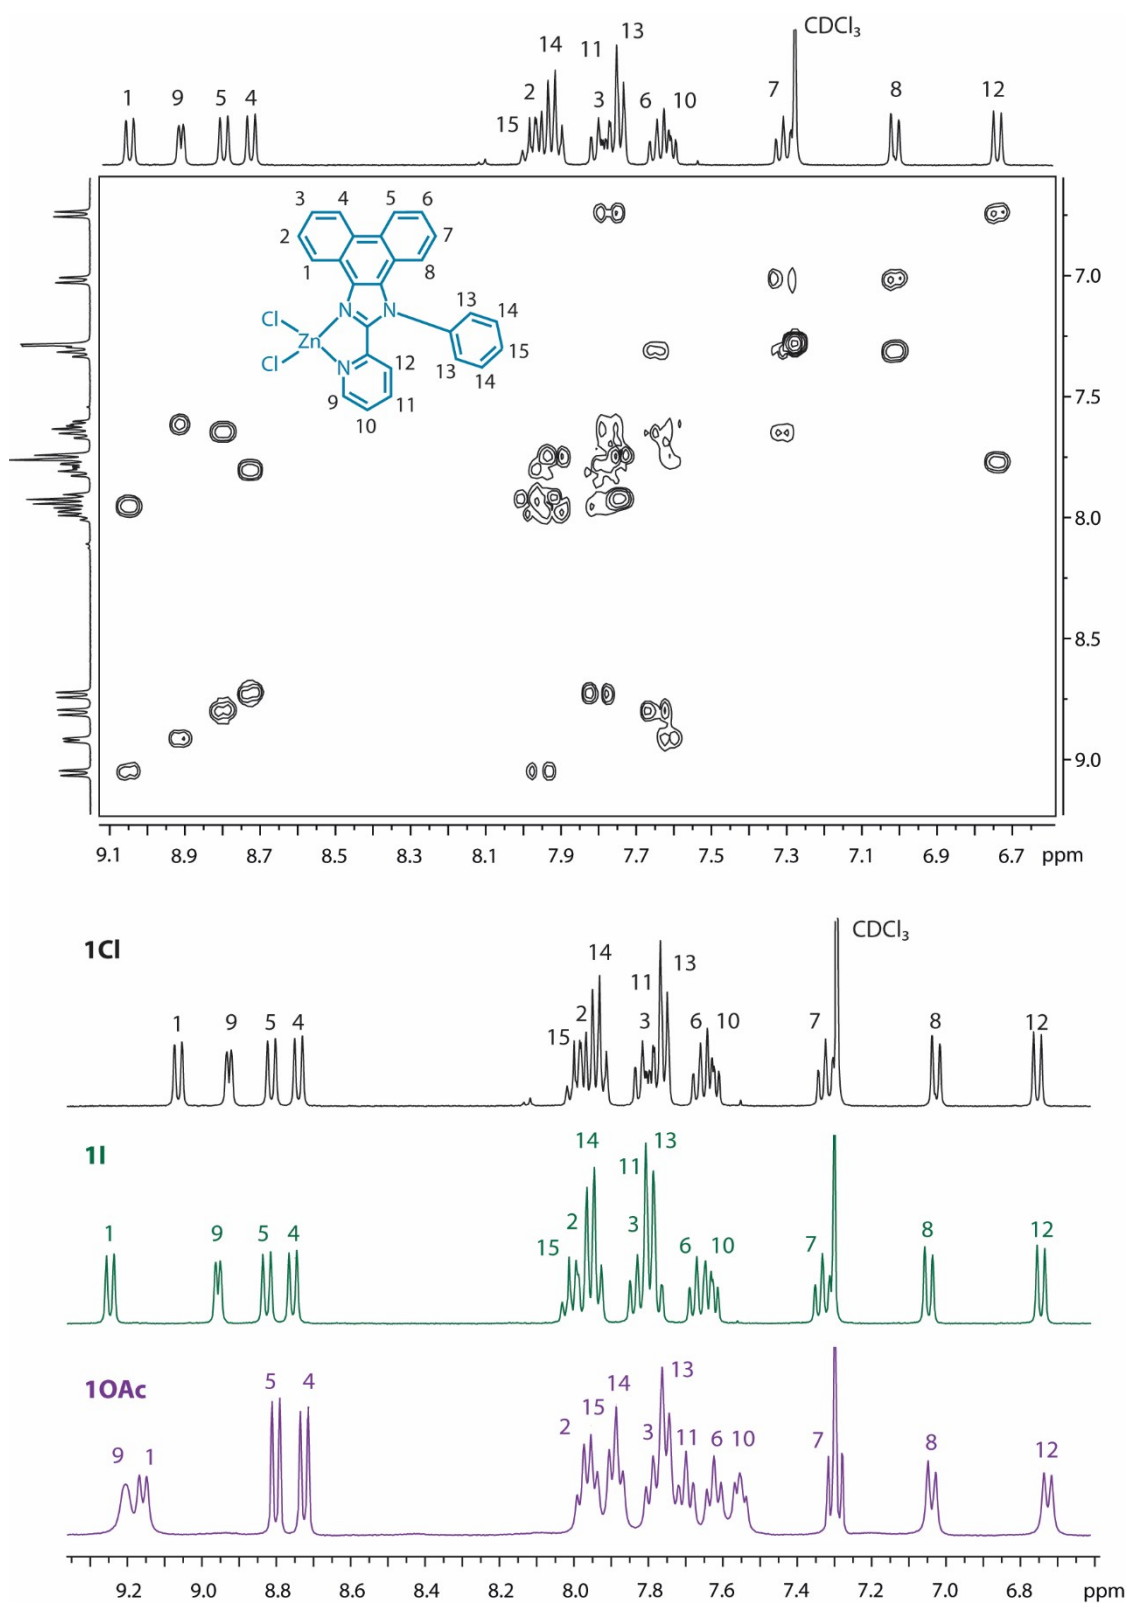

**Figure S1.**  $^1\text{H}$  NMR spectra of complexes **1X** in the aromatic region (400 MHz,  $\text{CDCl}_3$ , 298 K).

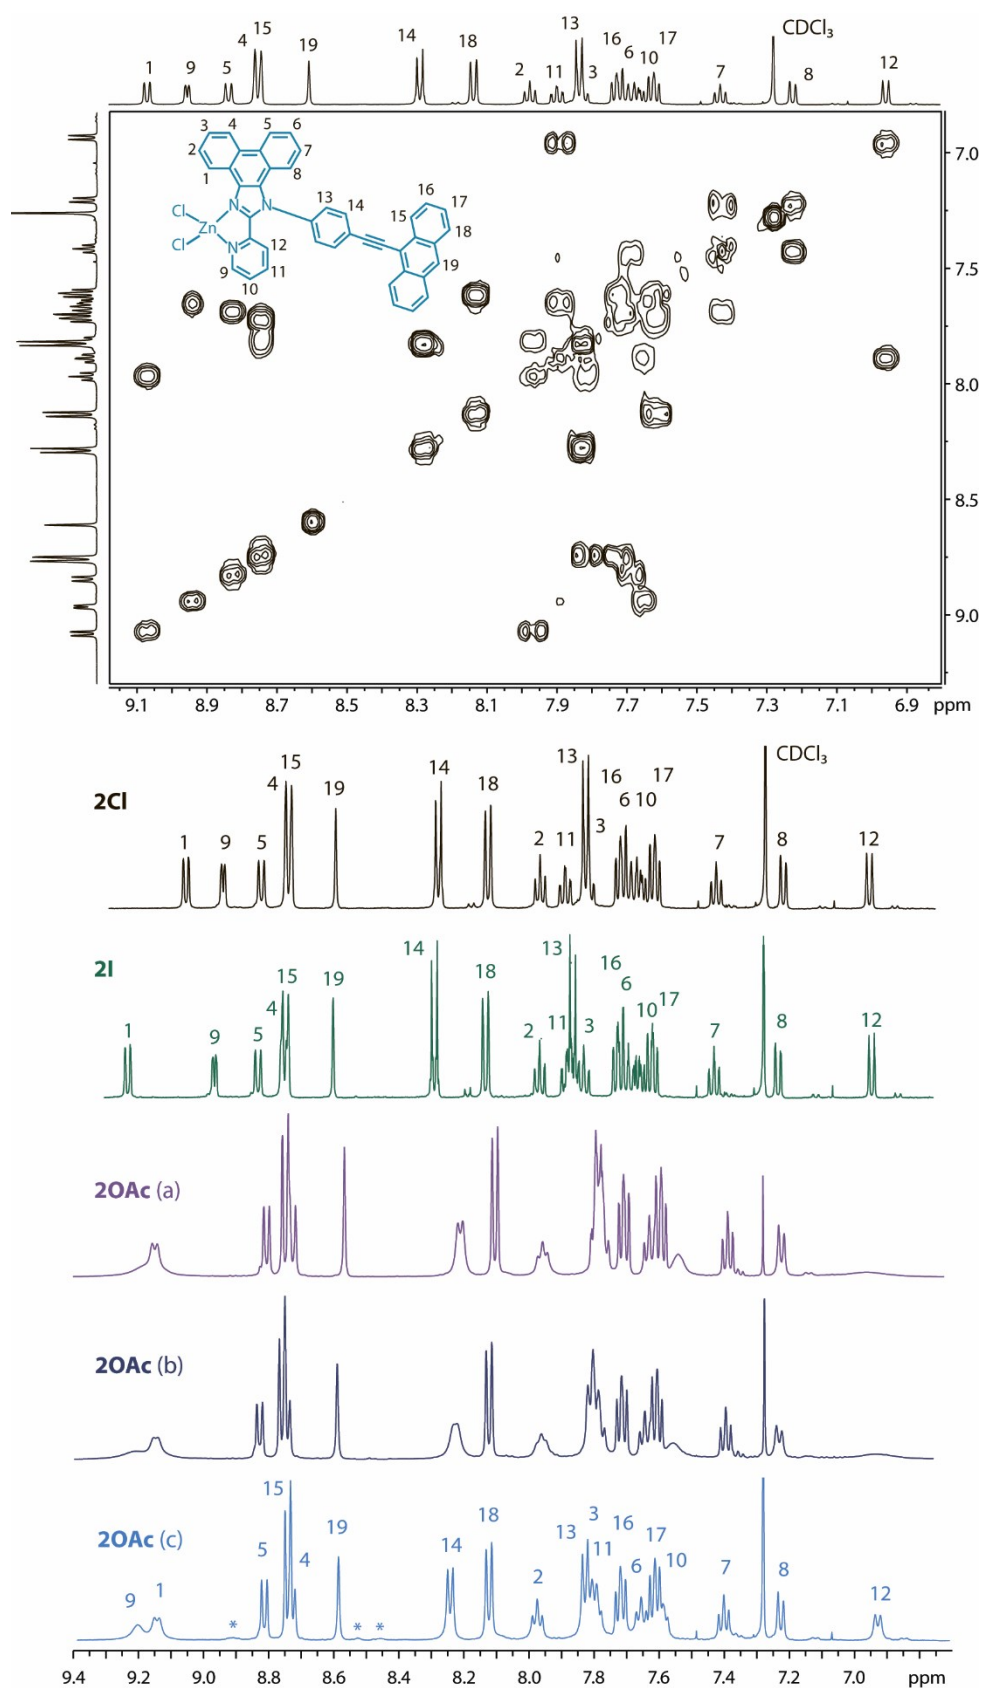

**Figure S2.**  $^1\text{H}$  NMR spectra of complexes **2Cl**, **2I** and of **2OAc** with various concentrations (a: 57.9 mmol/L; b: 18.1 mmol/L; c: 3.63 mmol/L, asterisks denote broadened signals assigned to the free **L2**) in the aromatic region (500 MHz,  $\text{CDCl}_3$ , 298 K).

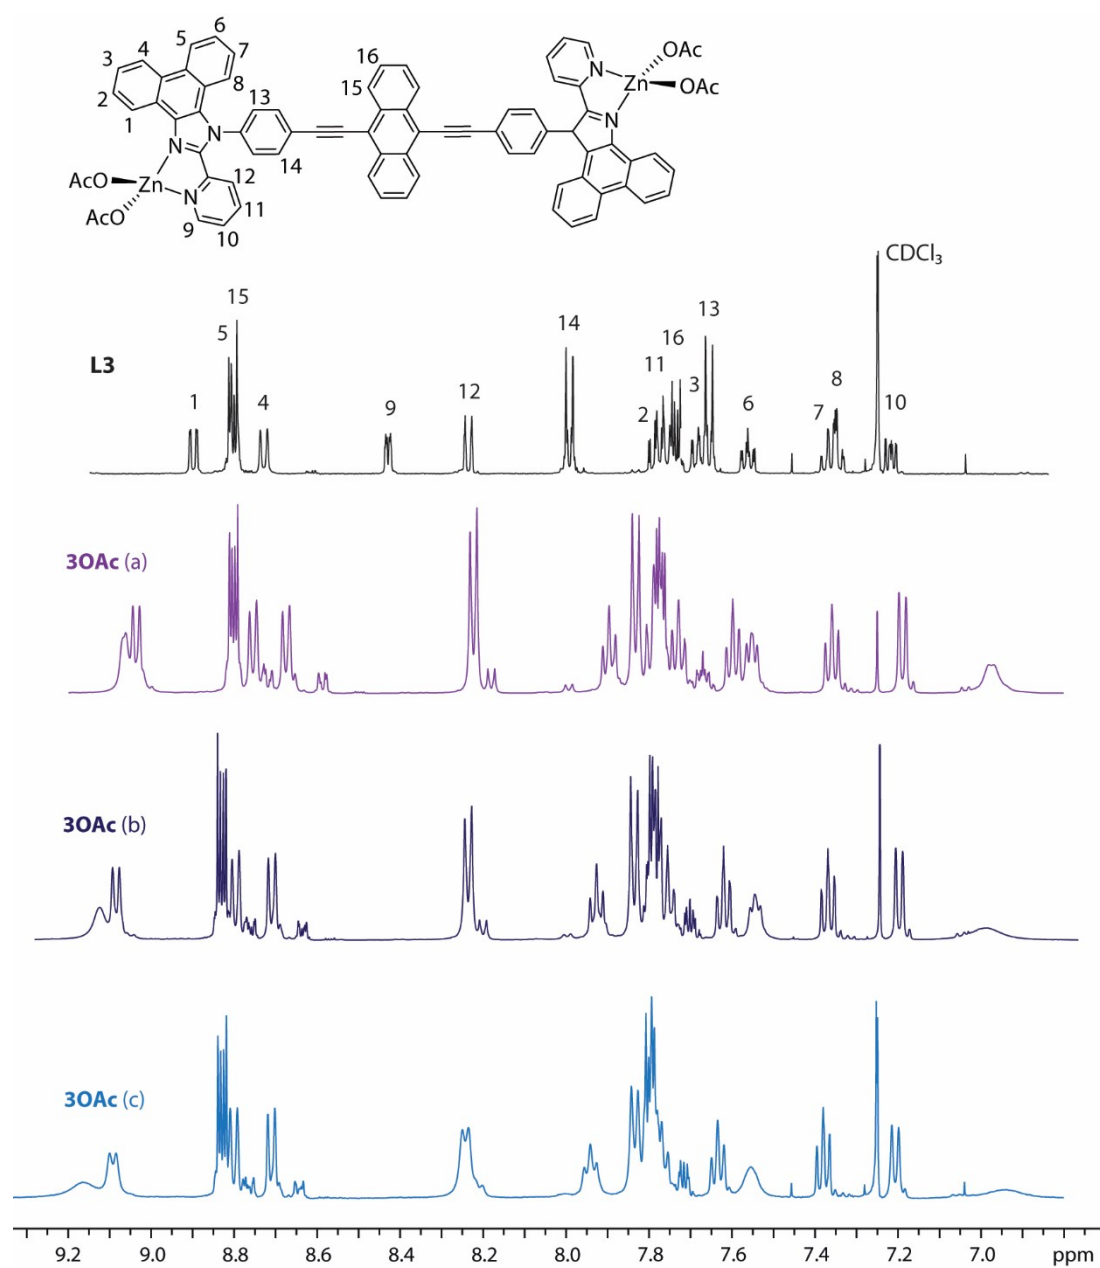

**Figure S3.**  $^1\text{H}$  NMR spectra of ligand **L3** and of complex **3OAc** at different concentrations (a: 8.5 mmol/L; b: 1.8 mmol/L; c: 0.42 mmol/L) in the aromatic region (500 MHz,  $\text{CDCl}_3$ , 298 K).

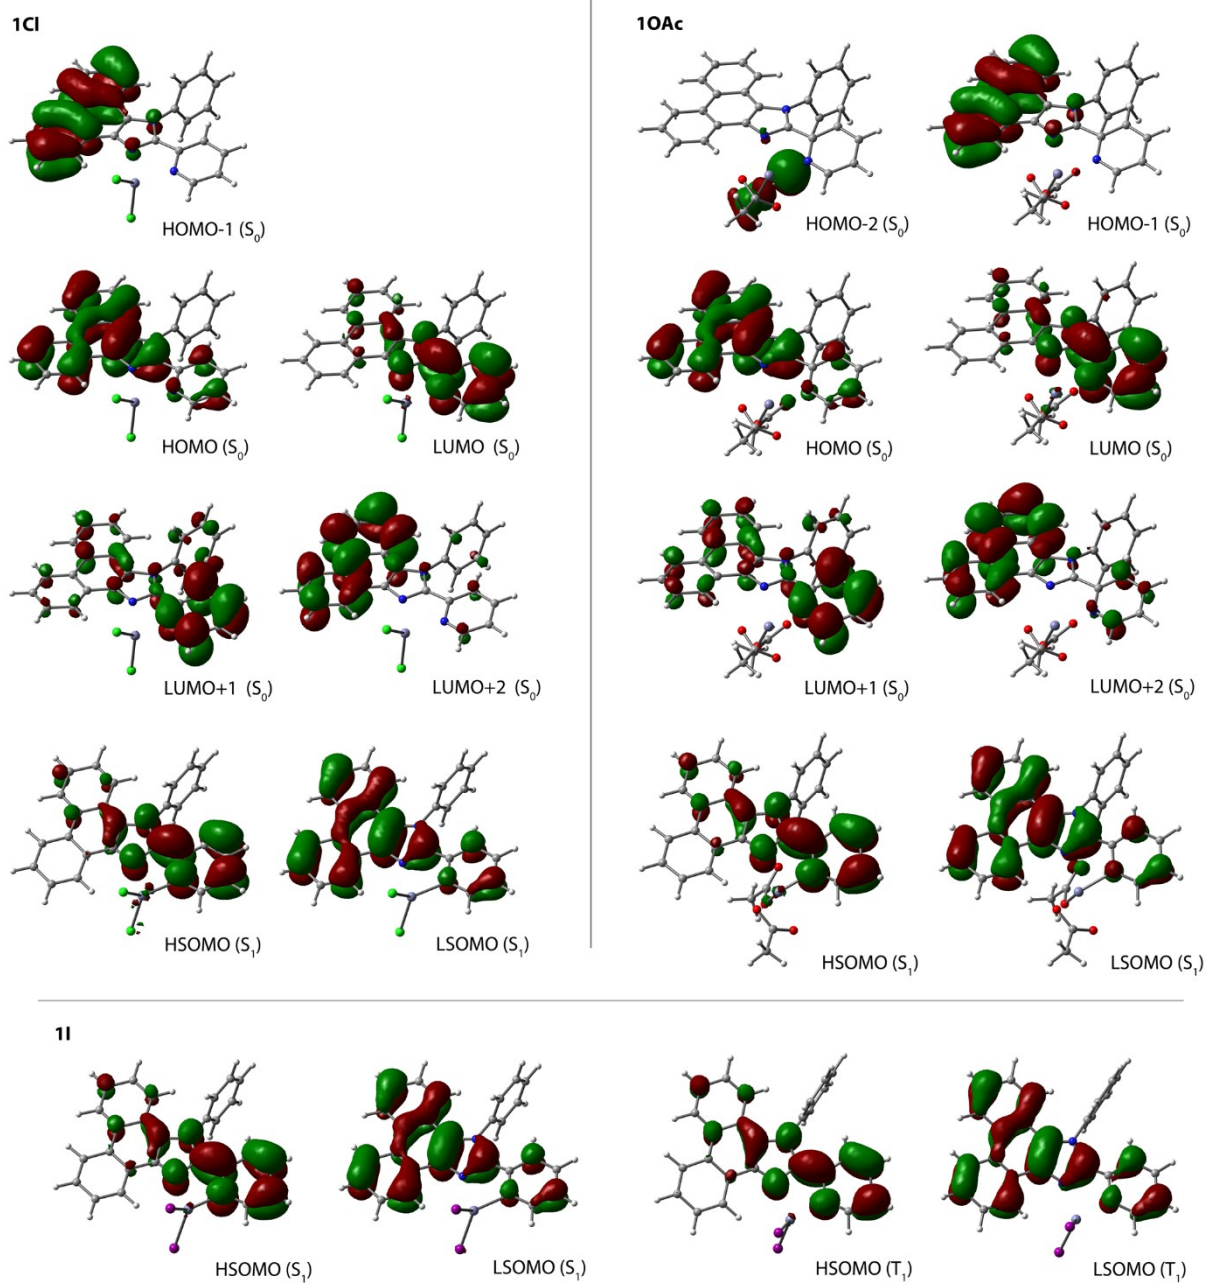

**Figure S4.** Frontier molecular orbitals for the ground and the lowest excited states of complexes **1Cl**, **1OAc** and **1I**.

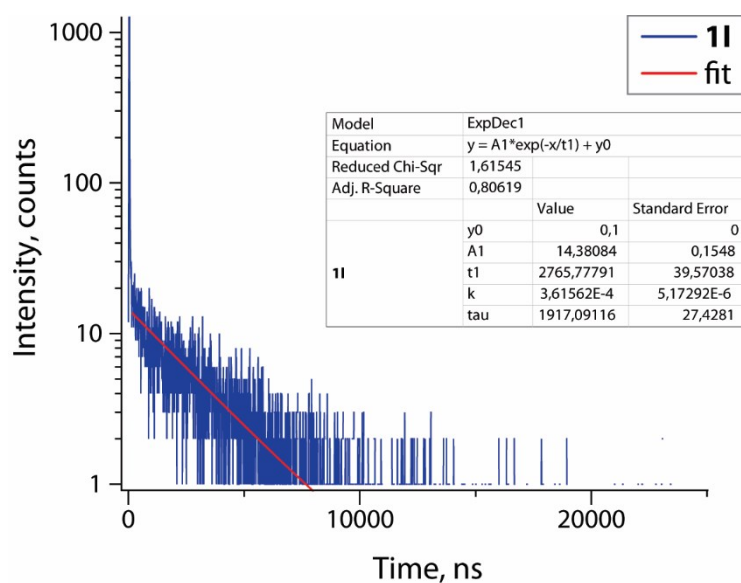

**Figure S5.** Decay profile for long live band for complex **1I** monitored at 560 nm (degassed 1,2-dichloroethane, 298 K,  $c = 10^{-5}$  M,  $\lambda_{exc} = 351$  nm).

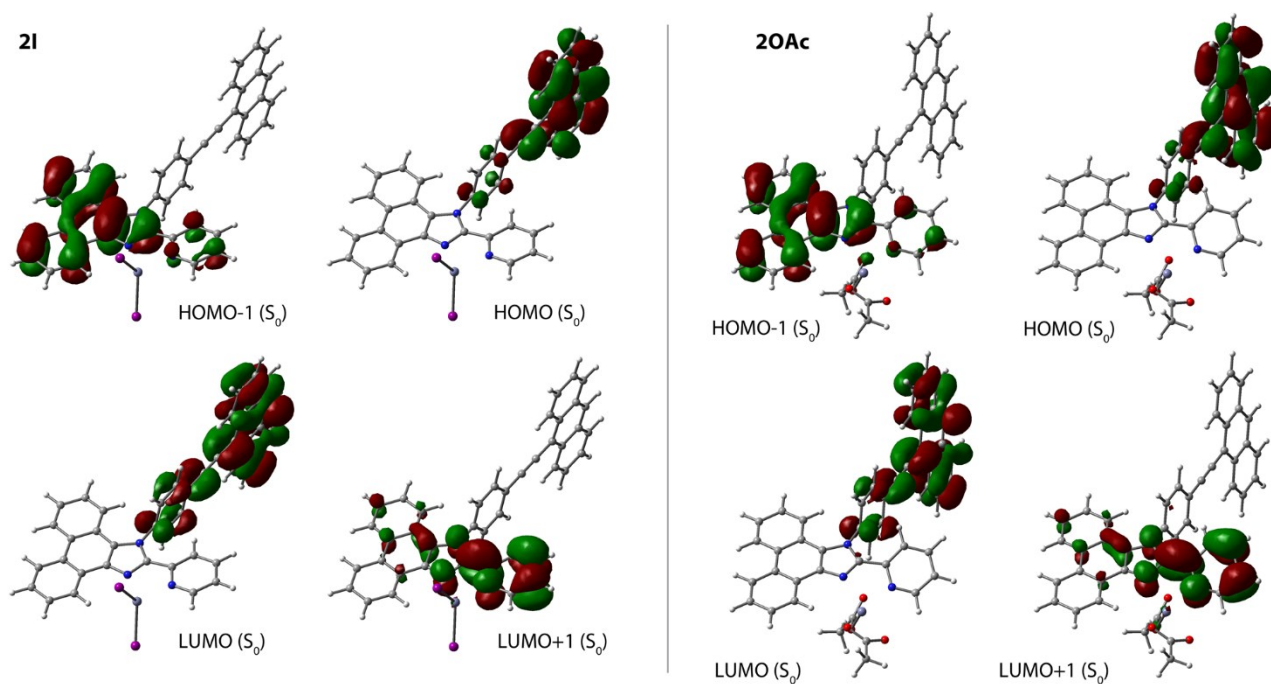

**Figure S6.** Frontier molecular orbitals for complexes **2I** and **2OAc**.



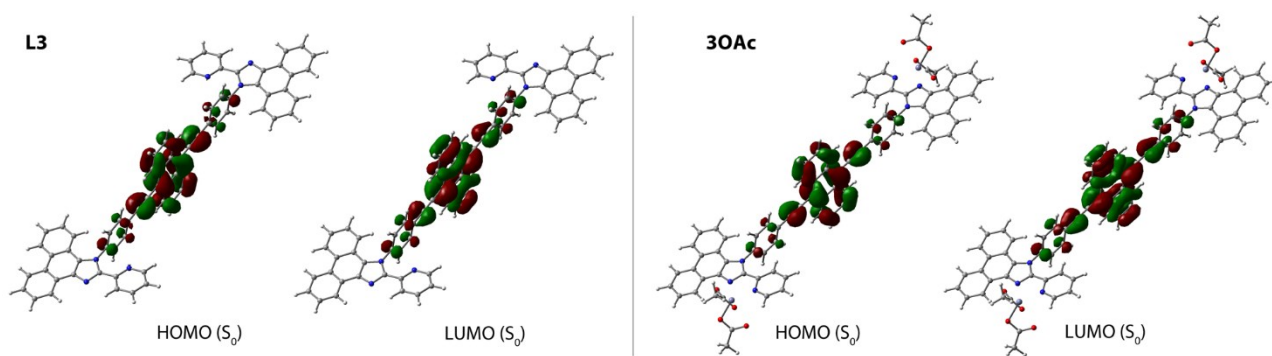

**Figure S7.** Frontier molecular orbitals for ligand **L3** and complex **3OAc**.

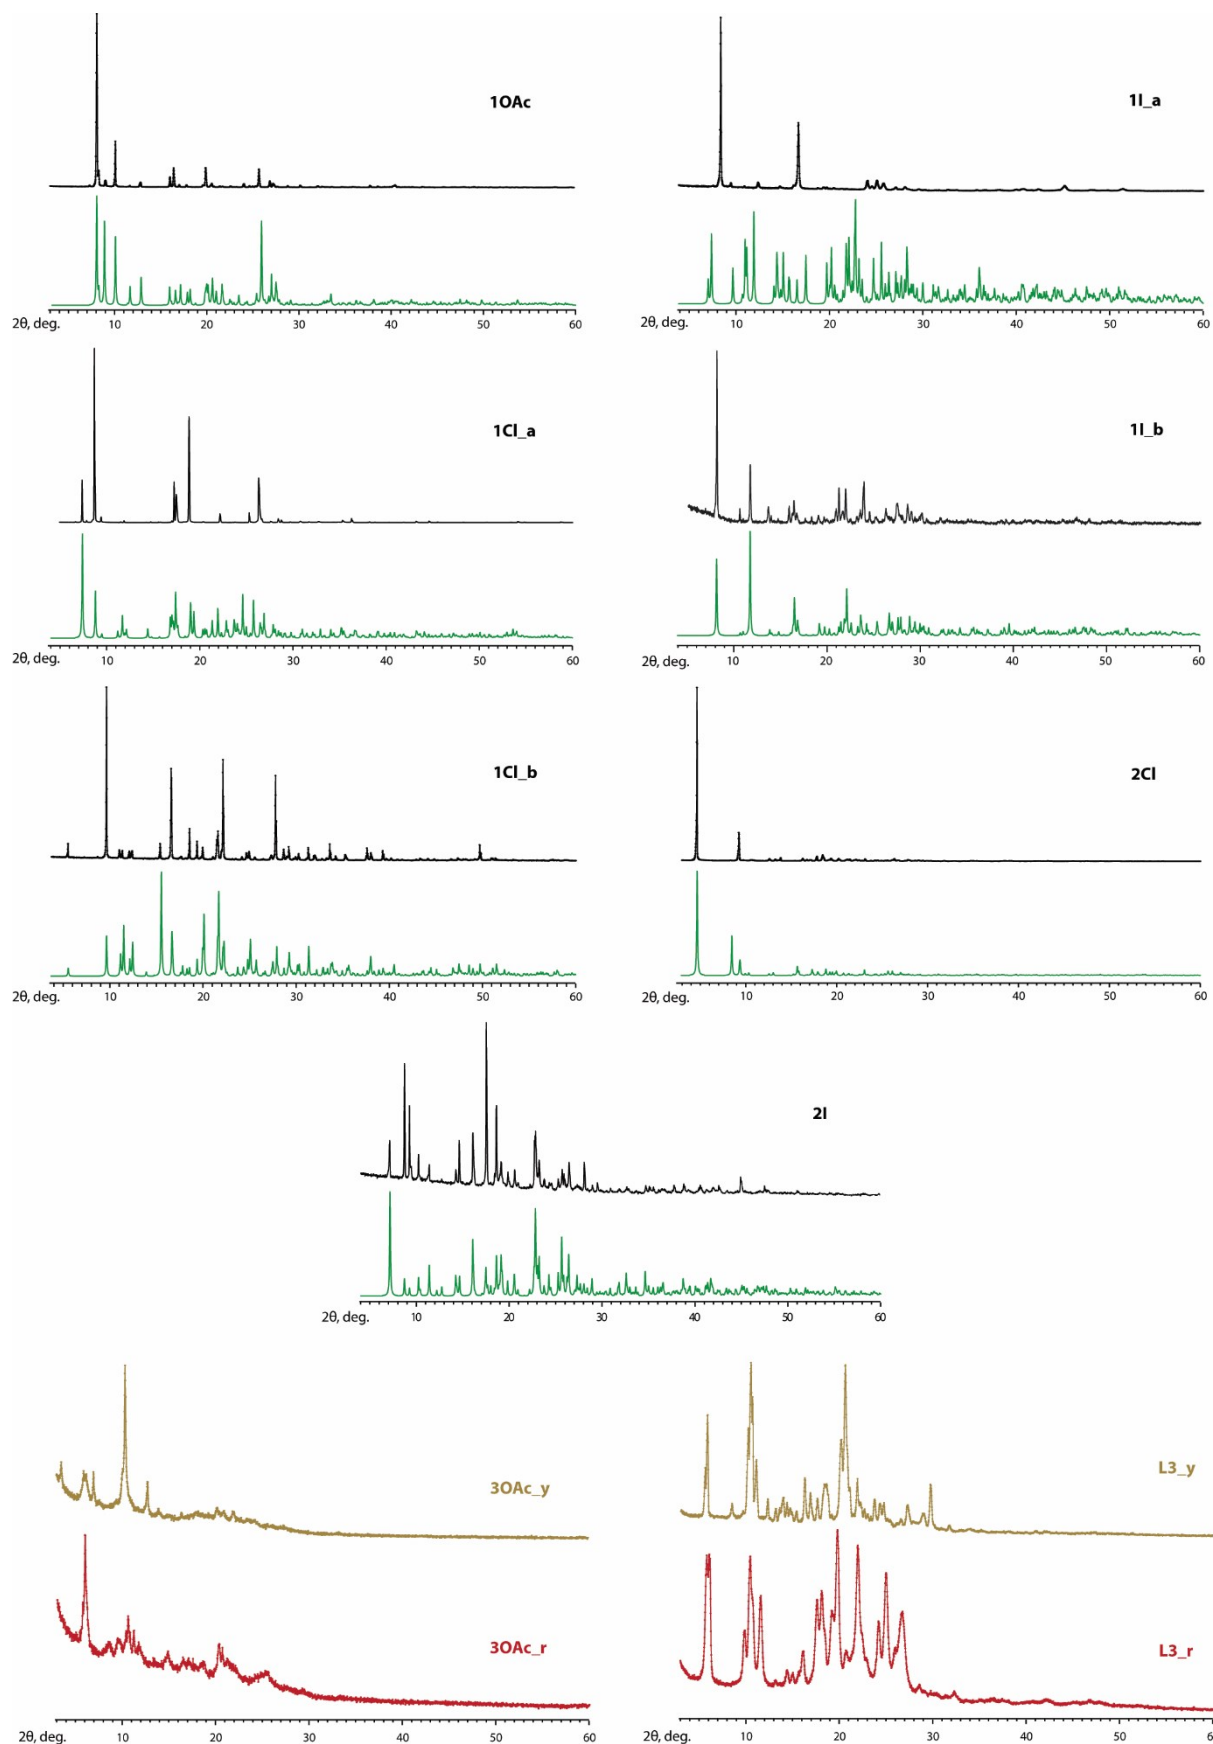

**Figure S8.** Powder XRD patterns for dried crystals of **10Ac**, **1Cl\_a/b**, **1I\_a/b**, **2Cl**, **2I** (green traces: simulated from single crystal data, black traces: experimental), **L3** and **3OAc** (yellow and red forms). The differences between the experimental and simulated diffractograms are attributed to the loss of crystallization solvent and the accompanying phase changes.

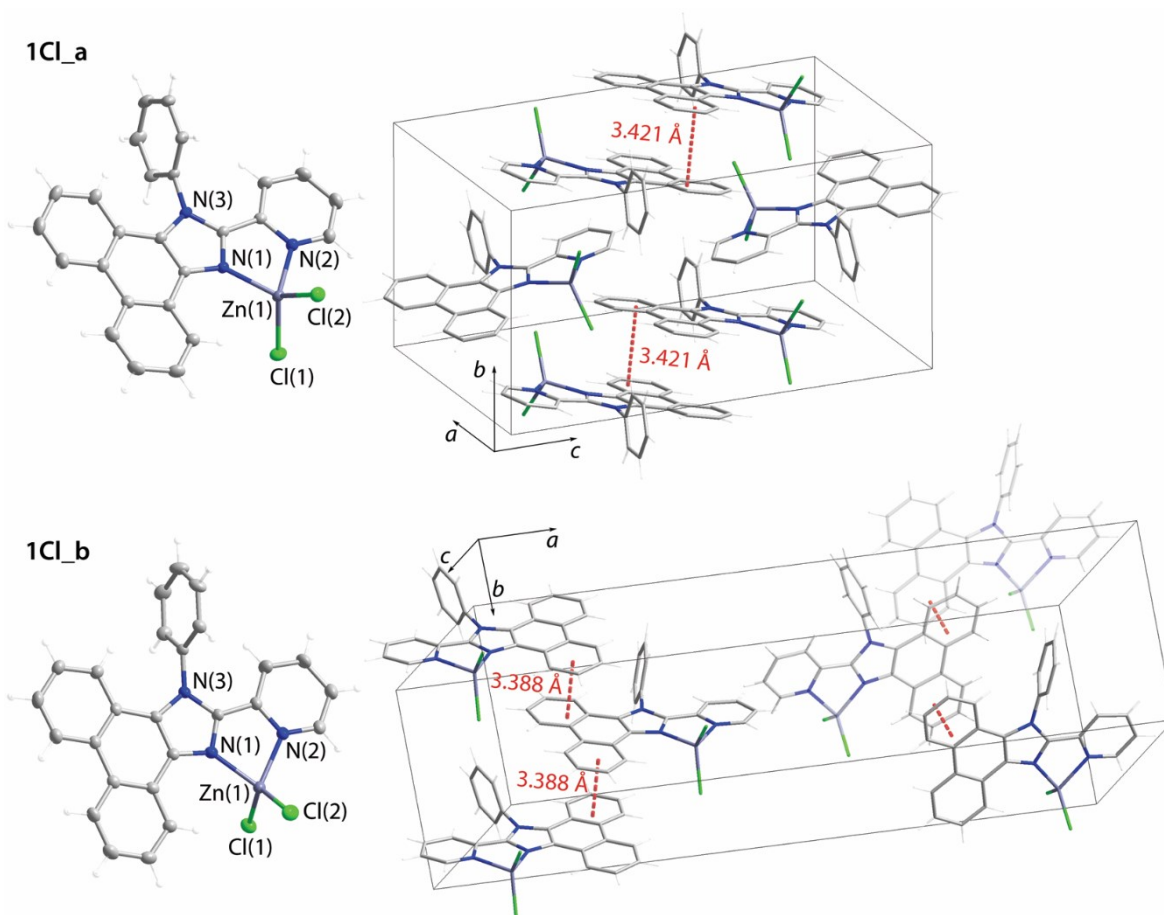

**Figure S9.** Molecular views and packing fragment (partial filling for **1Cl\_b**) for dichloromethane and chloroform solvates **1Cl\_a** (top) and **1Cl\_b** (bottom). The intermolecular  $\pi$ - $\pi$  distances were measured between the planes of the phenanthrene motifs. Crystallization solvent molecules are omitted for clarity. Thermal ellipsoids are shown at the 50% probability level.

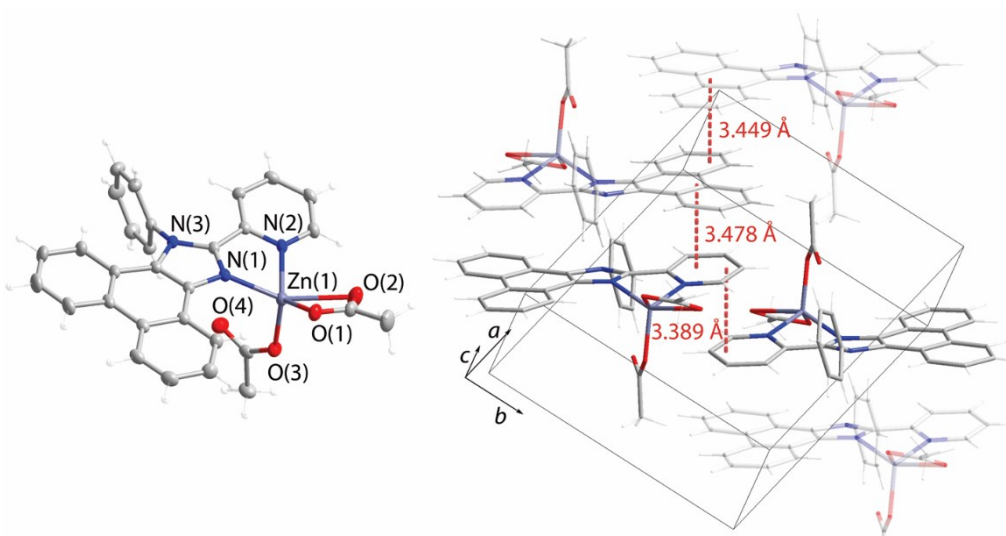

**Figure S10.** Molecular view and packing fragment for **10Ac**. Crystallization water molecules are omitted for clarity. Thermal ellipsoids are shown at the 50% probability level.

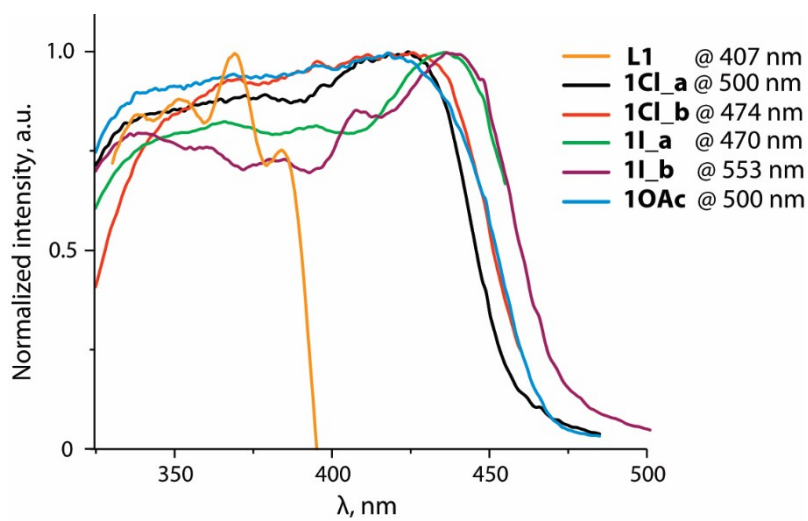

**Figure S11.** Normalized solid state excitation spectra for **L1** and the corresponding zinc(II) complexes **1X** at 298 K.

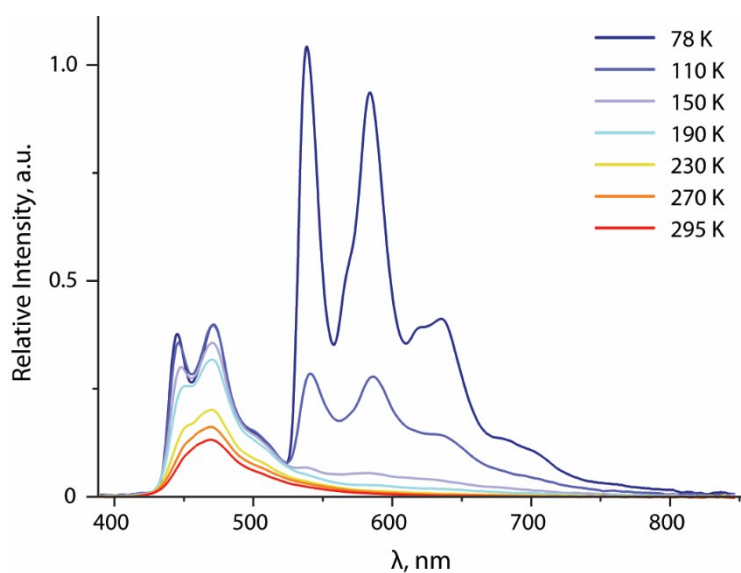

**Figure S12.** Variable temperature solid state emission spectra for **1I\_a**.

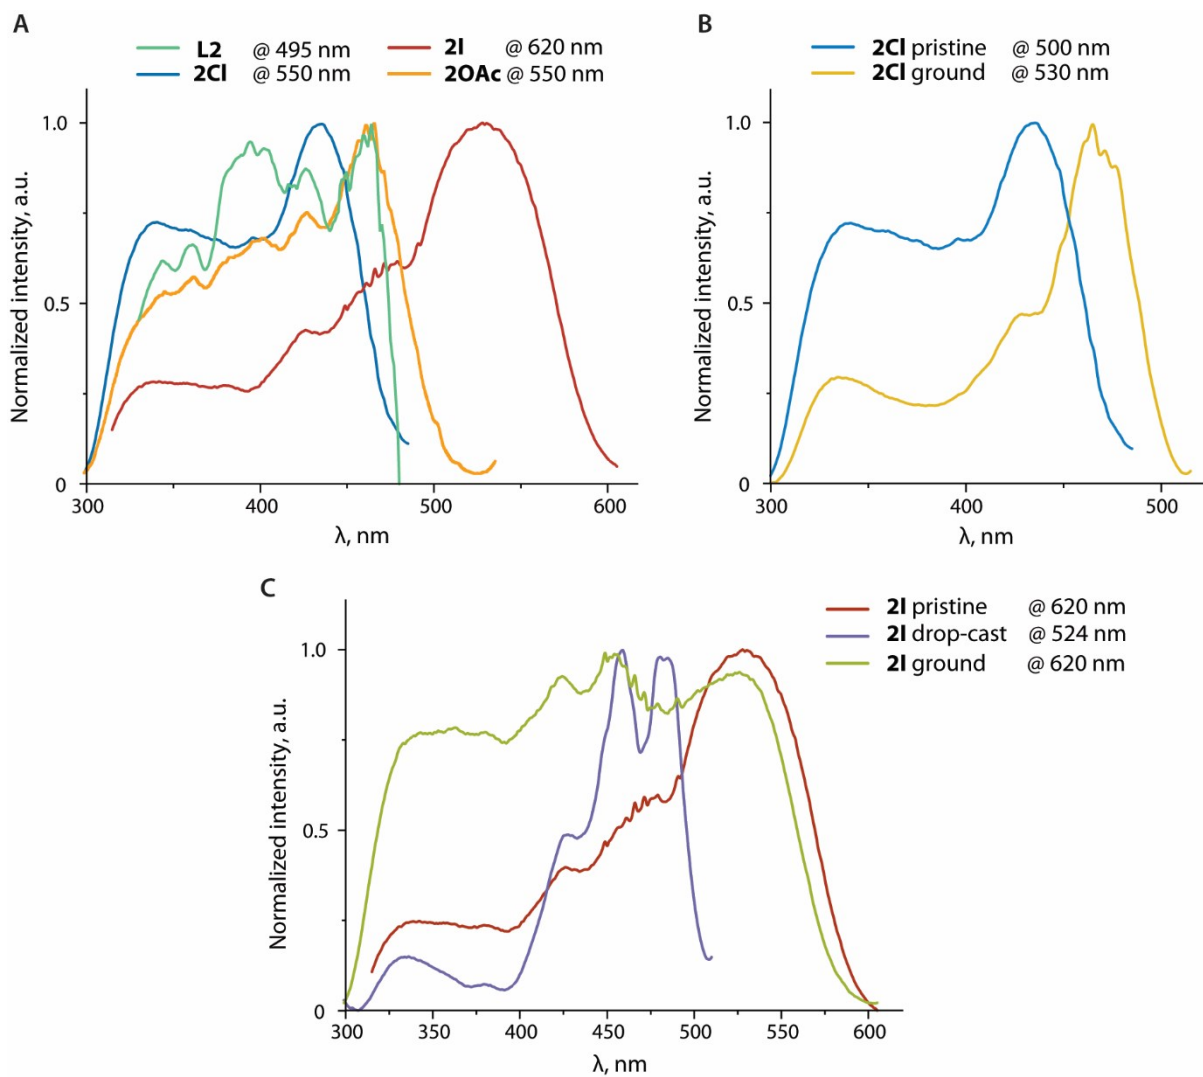

**Figure S13.** Normalized solid state excitation spectra for **L2** and the corresponding zinc(II) complexes **2X** at 298 K.

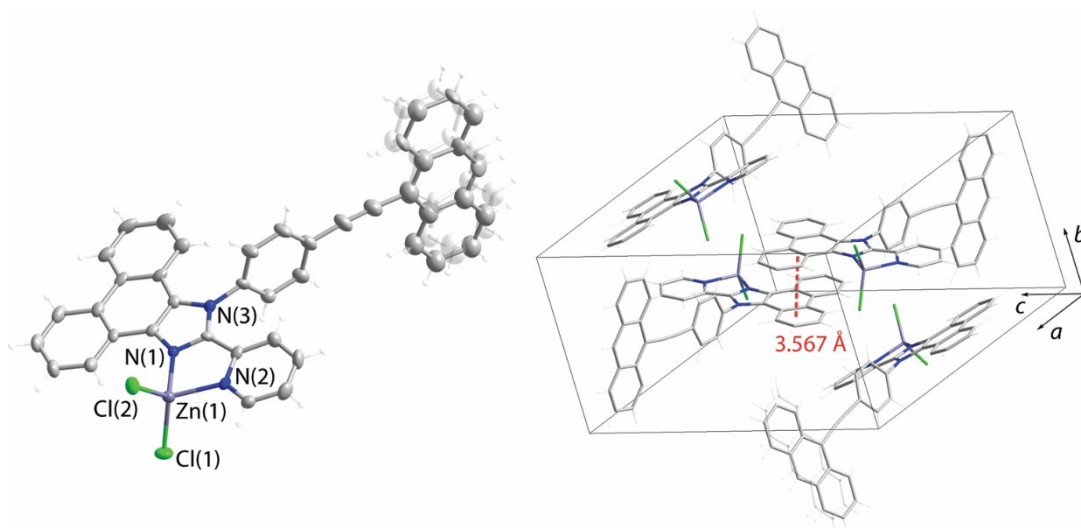

**Figure S14.** Molecular view and unit cell packing for **2Cl**. Two components of the disordered anthracene motif are shown. Crystallization solvent was disordered and omitted from the refinement model. The intermolecular  $\pi$ - $\pi$  distances were measured between the planes of the phenanthrene motifs. Thermal ellipsoids are shown at the 50% probability level.

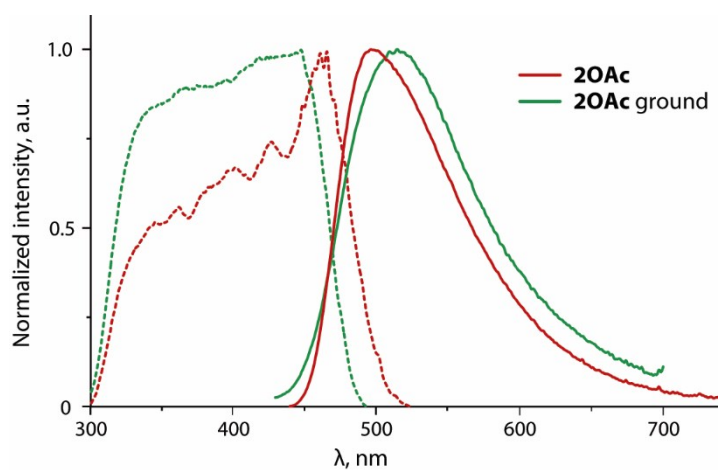

**Figure S15.** Normalized solid state excitation (dashed lines) and emission (solid lines) spectra for pristine and ground samples of complex **2OAc** at 298 K.

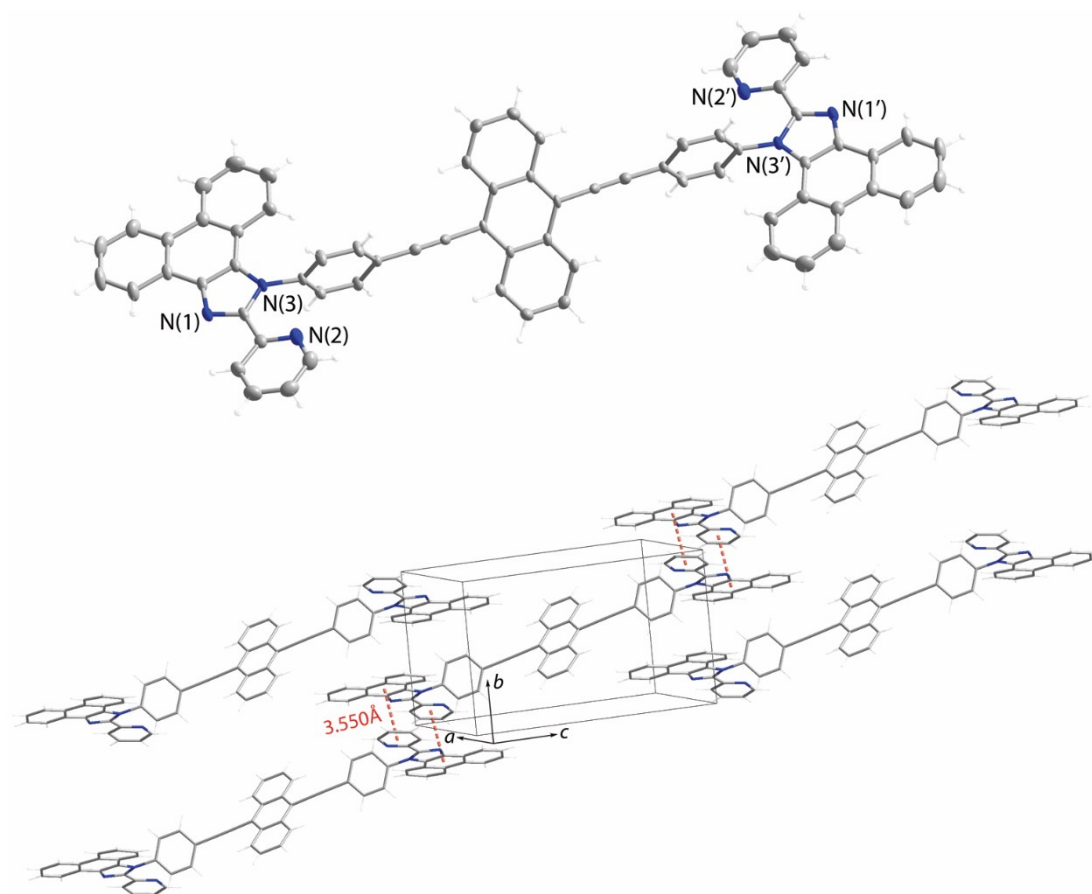

**Figure S16.** Molecular view and packing fragment for **L3\_y<sub>cr</sub>**. Crystallization solvent was disordered and omitted from the refinement model. The intermolecular  $\pi$ - $\pi$  distances were measured between the centroids of the phenanthrene and pyridine rings. Symmetry transformations used to generate equivalent atoms ('): 1-x, 1-y, 1-z. Thermal ellipsoids are shown at the 50% probability level.

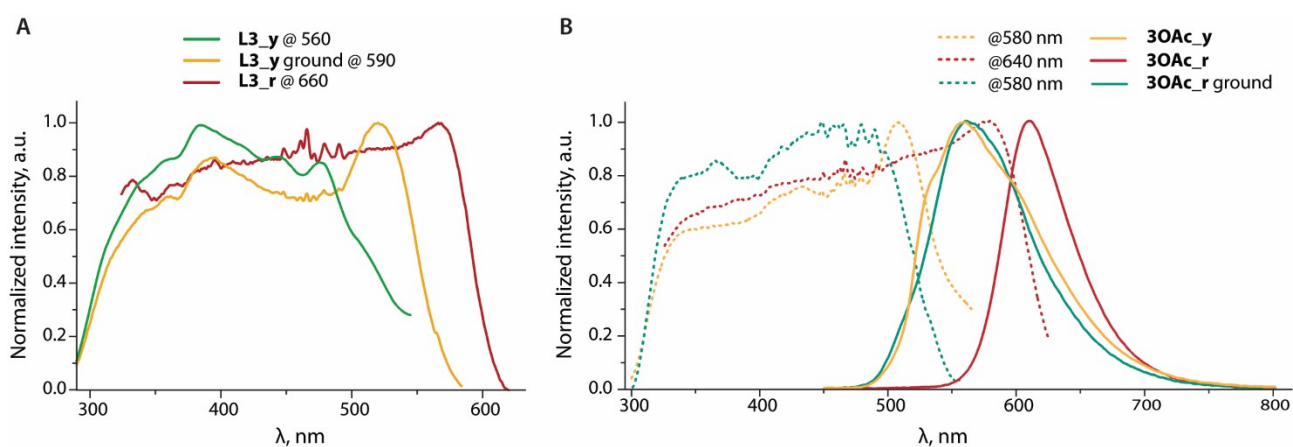

**Figure S17.** Normalized solid state excitation spectra for **L3** and the corresponding zinc(II) complex **3OAc** at 298 K.



## References

1. Cakmak, O.; Erenler, R.; Tutar, A.; Celik, N., *J. Org. Chem.* **2006**, *71*, 1795-1801.
2. Kisel, K. S.; Eskelinen, T.; Zafar, W.; Solomatina, A. I.; Hirva, P.; Grachova, E. V.; Tunik, S. P.; Koshevoy, I. O., *Inorg. Chem.* **2018**, *57*, 6349–6361.
3. *APEX2 - Software Suite for Crystallographic Programs*, Bruker AXS, Inc.: Madison, WI, USA, 2010.
4. Sheldrick, G. M. *SADABS-2008/1 - Bruker AXS Area Detector Scaling and Absorption Correction*, Bruker AXS: Madison, Wisconsin, USA, 2008.
5. Sheldrick, G. M., *Acta Crystallogr. C: Struct. Chem.* **2015**, *71*, 3-8.
6. Farrugia, L. J., *J. Appl. Crystallogr.* **2012**, *45*, 849–854.
7. Spek, A. L., *Acta Cryst.* **2015**, *C71*, 9–18.
8. Spek, A. L. *PLATON, A Multipurpose Crystallographic Tool*, 1.17; Utrecht University: Utrecht, The Netherlands, 2013.
9. Brouwer, A. M., *Pure & Appl. Chem.* **2011**, *83*, 2213–2228.
10. Frisch, M. J.; Trucks, G. W.; Schlegel, H. B.; Scuseria, G. E.; Robb, M. A.; Cheeseman, J. R.; Scalmani, G.; Barone, V.; Petersson, G. A.; Nakatsuji, H.; Li, X.; Caricato, M.; Marenich, A. V.; Bloino, J.; Janesko, B. G.; Gomperts, R.; Mennucci, B.; Hratchian, H. P.; Ortiz, J. V.; Izmaylov, A. F.; Sonnenberg, J. L.; Williams-Young, D.; Ding, F.; Lipparini, F.; Egidi, F.; Goings, J.; Peng, B.; Petrone, A.; Henderson, T.; Ranasinghe, D.; Zakrzewski, V. G.; Gao, J.; Rega, N.; Zheng, G.; Liang, W.; Hada, M.; Ehara, M.; Toyota, K.; Fukuda, R.; Hasegawa, J.; Ishida, M.; Nakajima, T.; Honda, Y.; Kitao, O.; Nakai, H.; Vreven, T.; Throssell, K.; Montgomery, J. A. J.; Peralta, J. E.; Ogliaro, F.; Bearpark, M. J.; Heyd, J. J.; Brothers, E. N.; Kudin, K. N.; Staroverov, V. N.; Keith, T. A.; Kobayashi, R.; Normand, J.; Raghavachari, K.; Rendell, A. P.; Burant, J. C.; Iyengar, S. S.; Tomasi, J.; Cossi, M.; Millam, J. M.; Klene, M.; Adamo, C.; Cammi, R.; Ochterski, J. W.; Martin, R. L.; Morokuma, K.; Farkas, O.; Foresman, J. B.; Fox, D. J. *Gaussian 16*, Revision A.03; Gaussian, Inc.: Wallingford CT, 2016.
11. Adamo, C.; Barone, V., *J. Chem. Phys.* **1999**, *110*, 6158-6170.
12. Grimme, S.; Antony, J.; Ehrlich, S.; Krieg, H., *J. Chem. Phys.* **2010**, *132*, 154104.
13. Grimme, S.; Ehrlich, S.; Goerigk, L., *J. Comput. Chem.* **2011**, *32*, 1456-1465.
14. Rappoport, D.; Furche, F., *J. Chem. Phys.* **2010**, *133*, 134105.
15. Barone, V.; Cossi, M., *J. Phys. Chem. A* **1998**, *102*, 1995–2001.
16. Cossi, M.; Rega, N.; Scalmani, G.; Barone, V., *J. Comput. Chem.* **2003**, *24*, 669–681.
